# Supplementary material for: Do Protected Areas Contribute to Health and Well-Being? A Cross-Cultural Comparison
Source: PubMed Central journal article supplement (PMC6479725; doi:10.3390/ijerph16071172), 2019-04-01
Supplement: ijerph-16-01172-s001.pdf [file ijerph-16-01172-s001.pdf]

# Annex II

## S2. Supplementary information: Additional statistical analysis.

### Table of contents

|     |                                                                                                                                           |    |
|-----|-------------------------------------------------------------------------------------------------------------------------------------------|----|
| 1.  | Relationships between motives to visit a protected area and visitor age.....                                                              | 2  |
| 2.  | Relationships between motives to visit a protected area and the type of protected area.....                                               | 4  |
| 3.  | Relationships between the circumstances to visit a PA and visitor age.....                                                                | 6  |
| 4.  | Relationships between the circumstances to visit a PA and the type of PA.....                                                             | 8  |
| 5.  | Relationships between the perceived benefits of visiting a PA and the type of PA.....                                                     | 11 |
| 6.  | Relationships between the perceived benefits of visiting a PA and visitor age.....                                                        | 15 |
| 7.  | Relationships between the symptoms improved by stay in PA and visitor age.....                                                            | 16 |
| 8.  | Relationships between the symptoms improved by stay in PA and the type of PA.....                                                         | 19 |
| 9.  | Relationships between the circumstances for PA visit and country (for two visitor age categories: age < 24 years and age > 65 years)..... | 23 |
| 10. | Relationships between the circumstances for PA visit and country (for visitor age category < 24 years).....                               | 24 |
| 11. | Relationships between the circumstances for PA visit and country (for visitor age category > 65 years).....                               | 25 |
| 12. | Relationships between the symptoms that can be reduced by contact with nature and country (for visitor age category < 24 years).....      | 27 |
| 13. | Relationships between the symptoms that can be reduced by contact with nature and country (for visitor age category > 65 years).....      | 29 |
| 14. | Relationships between the circumstances for PA visit and country (whole sample; results of post-hoc tests).....                           | 33 |

# 1. Relationships between motives to visit a protected area and visitor age.

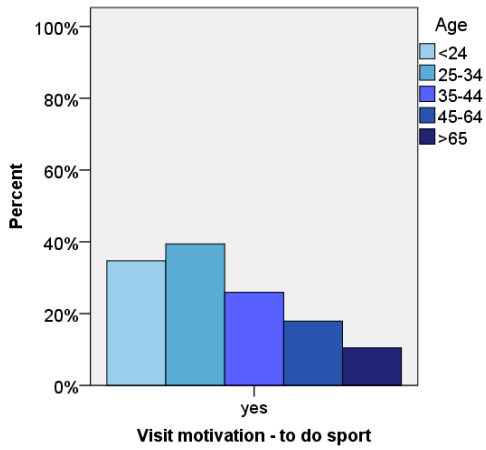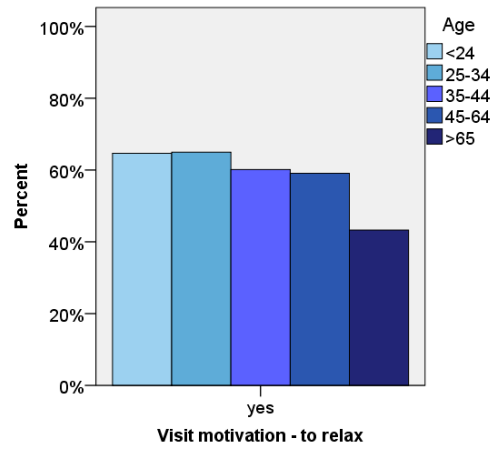

Pearson Chi-Sq =58,276; df =4; Asymp. Sig. (2-sided) = .000

Pearson Chi-Sq = 13,455; df =4; Asymp. Sig. (2-sided) = .009

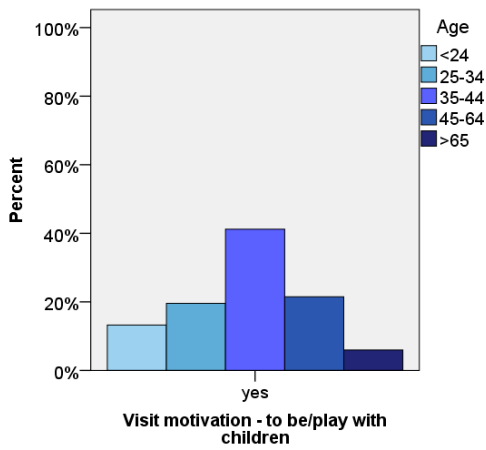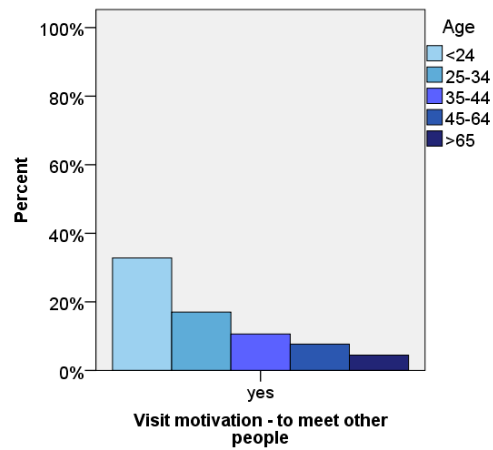

Pearson Chi-Sq = 87,66; df =4; Asymp. Sig. (2-sided) = .000

Pearson Chi-Sq =100,087; df =4; Asymp. Sig. (2-sided) =.000

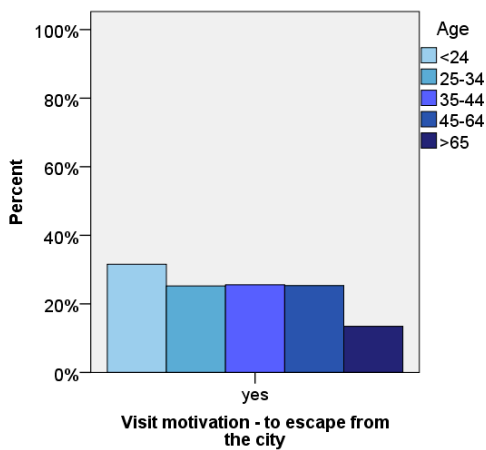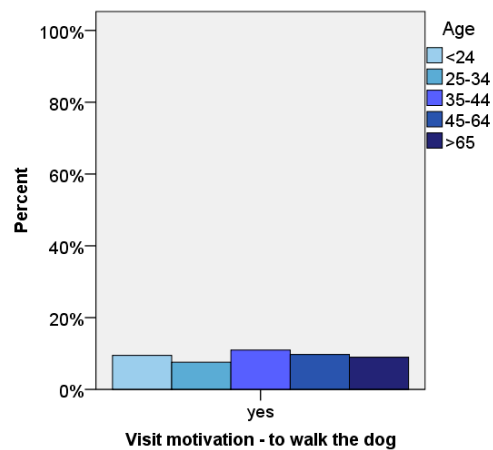

Pearson Chi-Sq =10,701; df =4; Asymp. Sig. (2-sided) = .030

Pearson Chi-Sq = 2,172; df =4; Asymp. Sig. (2-sided) = .704

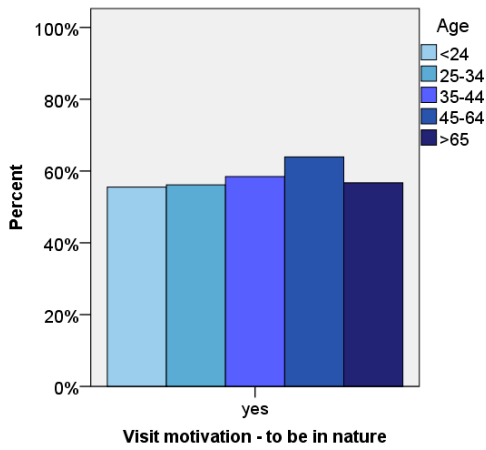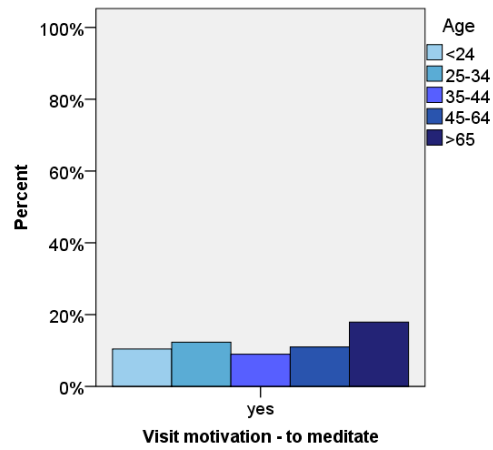

Pearson Chi-Sq = ; df=4 6,713; Asymp. Sig. (2-sided) = .152

Pearson Chi-Sq = 5,170; df=4; Asymp. Sig. (2-sided) = .270

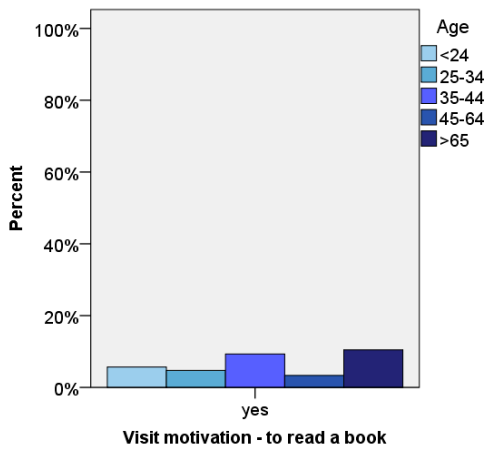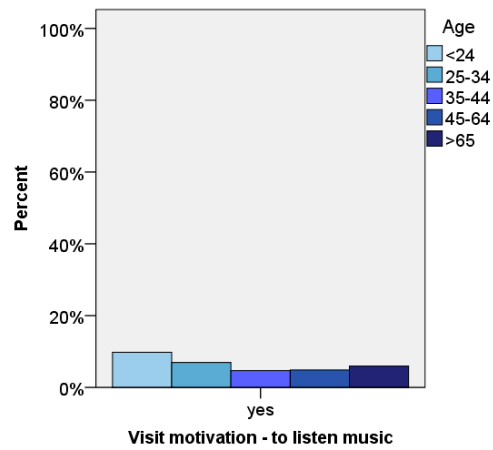

Pearson Chi-Sq = 14,427; df=4; Asymp. Sig. (2-sided) = .006

Pearson Chi-Sq = 9,214; df=4; Asymp. Sig. (2-sided) = .056

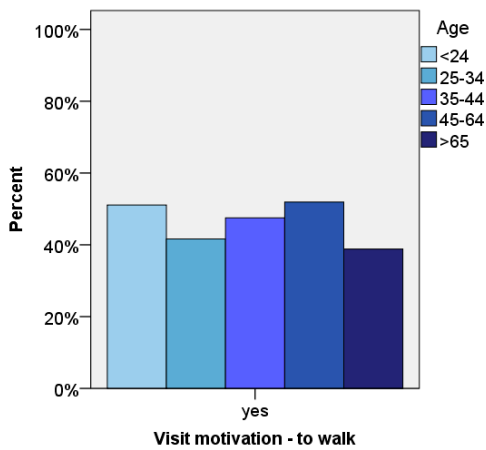

Pearson Chi-Sq = 11,047; df=4; Asymp. Sig. (2-sided) = .026

## 2. Relationships between motives to visit a protected area and the type of protected area

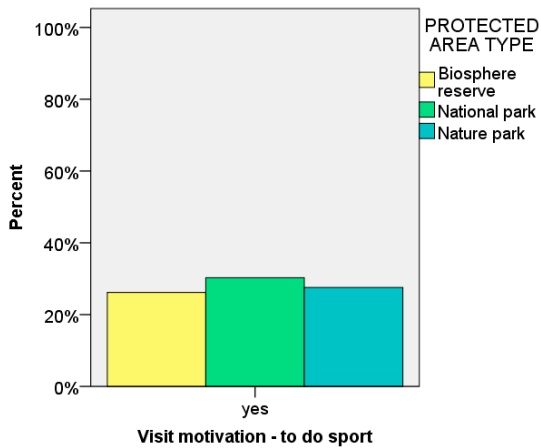

Pearson Chi-Sq = 1,997; df =2; Asymp. Sig. (2-sided) = .369

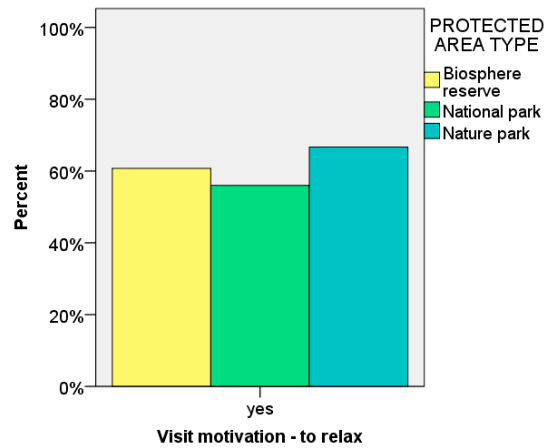

Pearson Chi-Sq = 11,173; df =2; Asymp. Sig. (2-sided) = .004

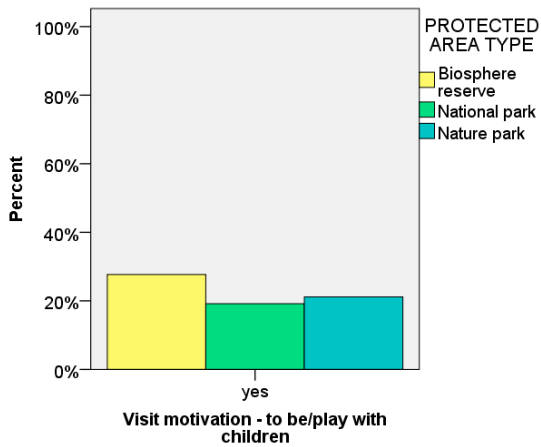

Pearson Chi-Sq = 10,491; df =2; Asymp. Sig. (2-sided) = .005

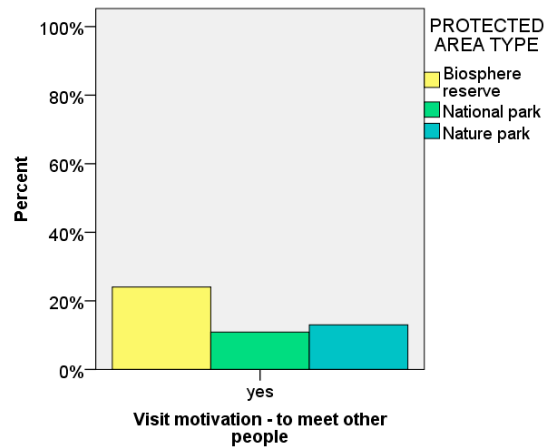

Pearson Chi-Sq = 34,336; df =2; Asymp. Sig. (2-sided) = .000

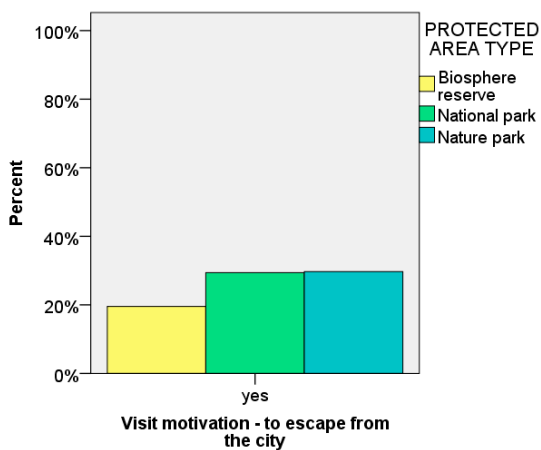

Pearson Chi-Sq = 16,143; df =2; Asymp. Sig. (2-sided) = .000

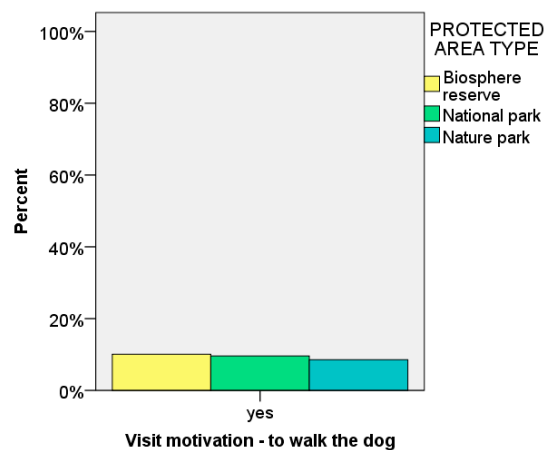

Pearson Chi-Sq = ,676; df =2; Asymp. Sig. (2-sided) = .713

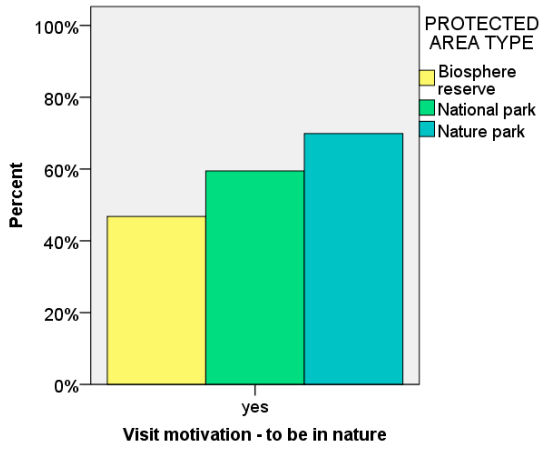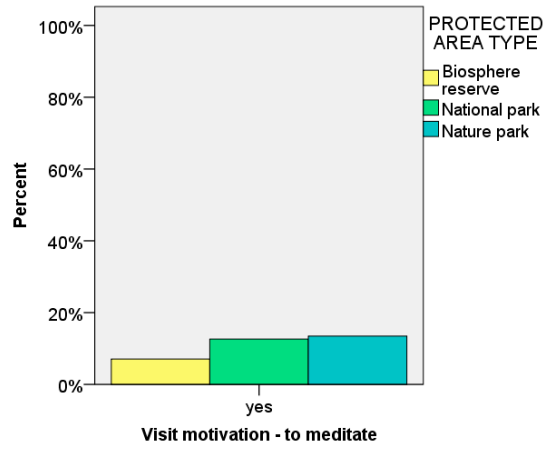

Pearson Chi-Sq = 51,523; df =2; Asymp. Sig. (2-sided) = .000

Pearson Chi-Sq = 11,406; df =2; Asymp. Sig. (2-sided) = .003

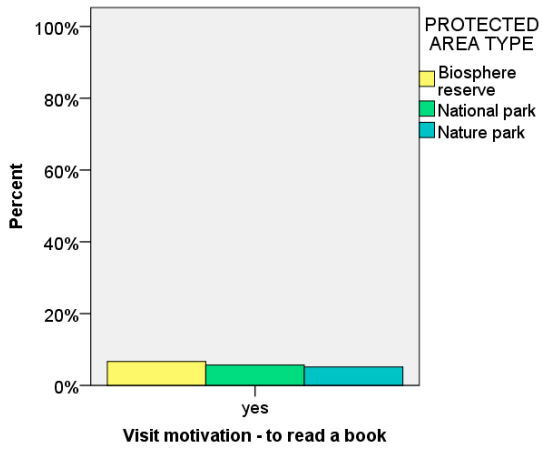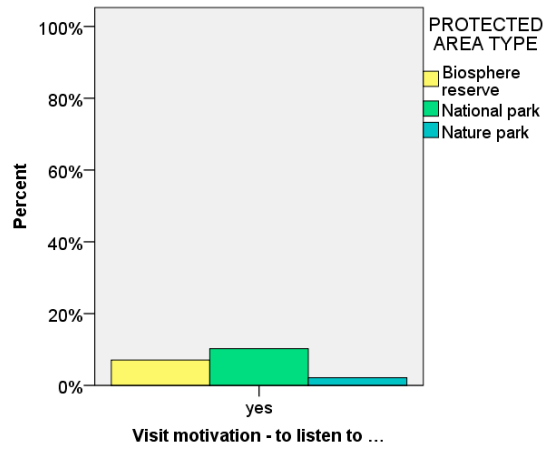

Pearson Chi-Sq = 1,019; df =2; Asymp. Sig. (2-sided) = .601

Pearson Chi-Sq = 25,622; df =2; Asymp. Sig. (2-sided) = .000

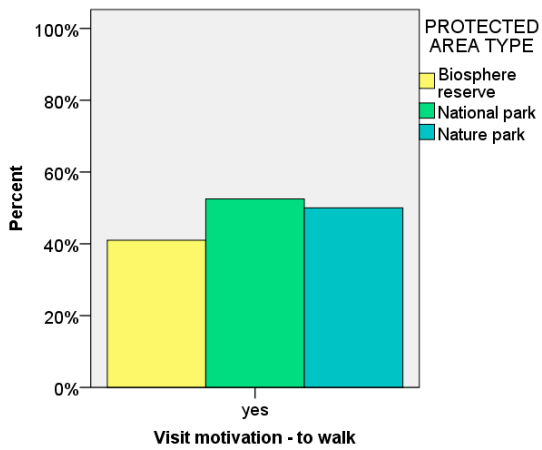

Pearson Chi-Sq = 13,649; df =2; Asymp. Sig. (2-sided) = .001

### 3. Relationships between the circumstances to visit a PA and visitor age

#### Descriptives

|                                                                                          |       | 95% Confidence Interval for Mean |             | Minimum | Maximum |
|------------------------------------------------------------------------------------------|-------|----------------------------------|-------------|---------|---------|
|                                                                                          |       | Lower Bound                      | Upper Bound |         |         |
| Circumstances for park visit - when I need tranquility                                   | <24   | 2,10                             | 2,37        | 1       | 5       |
|                                                                                          | 25-34 | 1,89                             | 2,11        | 1       | 5       |
|                                                                                          | 35-44 | 1,70                             | 1,90        | 1       | 5       |
|                                                                                          | 45-64 | 1,71                             | 1,92        | 1       | 5       |
|                                                                                          | >65   | 1,35                             | 1,66        | 1       | 3       |
|                                                                                          | Total | 1,88                             | 1,99        | 1       | 5       |
| Circumstances for park visit - when I'm feeling good                                     | <24   | 1,97                             | 2,20        | 1       | 5       |
|                                                                                          | 25-34 | 1,93                             | 2,12        | 1       | 5       |
|                                                                                          | 35-44 | 1,75                             | 1,95        | 1       | 5       |
|                                                                                          | 45-64 | 1,82                             | 1,98        | 1       | 5       |
|                                                                                          | >65   | 1,55                             | 1,94        | 1       | 5       |
|                                                                                          | Total | 1,91                             | 2,00        | 1       | 5       |
| Circumstances for park visit - when I'm feeling bad (emotionally stressed, or depressed) | <24   | 2,69                             | 2,97        | 1       | 5       |
|                                                                                          | 25-34 | 2,38                             | 2,63        | 1       | 5       |
|                                                                                          | 35-44 | 2,62                             | 2,90        | 1       | 5       |
|                                                                                          | 45-64 | 2,40                             | 2,65        | 1       | 5       |
|                                                                                          | >65   | 2,34                             | 2,92        | 1       | 5       |
|                                                                                          | Total | 2,58                             | 2,71        | 1       | 5       |
| Circumstances for park visit - when I want to escape from the city                       | <24   | 2,23                             | 2,52        | 1       | 5       |
|                                                                                          | 25-34 | 1,97                             | 2,24        | 1       | 5       |
|                                                                                          | 35-44 | 1,78                             | 2,04        | 1       | 5       |
|                                                                                          | 45-64 | 2,01                             | 2,28        | 1       | 5       |
|                                                                                          | >65   | 1,58                             | 2,01        | 1       | 5       |
|                                                                                          | Total | 2,06                             | 2,19        | 1       | 5       |

#### ANOVA

|                                                                                          |                | Sum of Squares | df   | Mean Square | F      |
|------------------------------------------------------------------------------------------|----------------|----------------|------|-------------|--------|
| Circumstances for park visit - when I need tranquility                                   | Between Groups | 53,432         | 4    | 13,358      | 12,512 |
|                                                                                          | Within Groups  | 1480,749       | 1387 | 1,068       |        |
|                                                                                          | Total          | 1534,181       | 1391 |             |        |
| Circumstances for park visit - when I'm feeling good                                     | Between Groups | 14,313         | 4    | 3,578       | 4,534  |
|                                                                                          | Within Groups  | 1094,557       | 1387 | ,789        |        |
|                                                                                          | Total          | 1108,871       | 1391 |             |        |
| Circumstances for park visit - when I'm feeling bad (emotionally stressed, or depressed) | Between Groups | 27,308         | 4    | 6,827       | 4,587  |
|                                                                                          | Within Groups  | 2064,502       | 1387 | 1,488       |        |
|                                                                                          | Total          | 2091,810       | 1391 |             |        |

|                                                                    |                |          |      |        |       |
|--------------------------------------------------------------------|----------------|----------|------|--------|-------|
| Circumstances for park visit - when I want to escape from the city | Between Groups | 41,509   | 4    | 10,377 | 6,782 |
|                                                                    | Within Groups  | 2122,215 | 1387 | 1,530  |       |
|                                                                    | Total          | 2163,724 | 1391 |        |       |

### ANOVA

|                                                                                          |                | Sig. |
|------------------------------------------------------------------------------------------|----------------|------|
| Circumstances for park visit - when I need tranquility                                   | Between Groups | ,000 |
|                                                                                          | Within Groups  |      |
|                                                                                          | Total          |      |
| Circumstances for park visit - when I'm feeling good                                     | Between Groups | ,001 |
|                                                                                          | Within Groups  |      |
|                                                                                          | Total          |      |
| Circumstances for park visit - when I'm feeling bad (emotionally stressed, or depressed) | Between Groups | ,001 |
|                                                                                          | Within Groups  |      |
|                                                                                          | Total          |      |
| Circumstances for park visit - when I want to escape from the city                       | Between Groups | ,000 |
|                                                                                          | Within Groups  |      |
|                                                                                          | Total          |      |

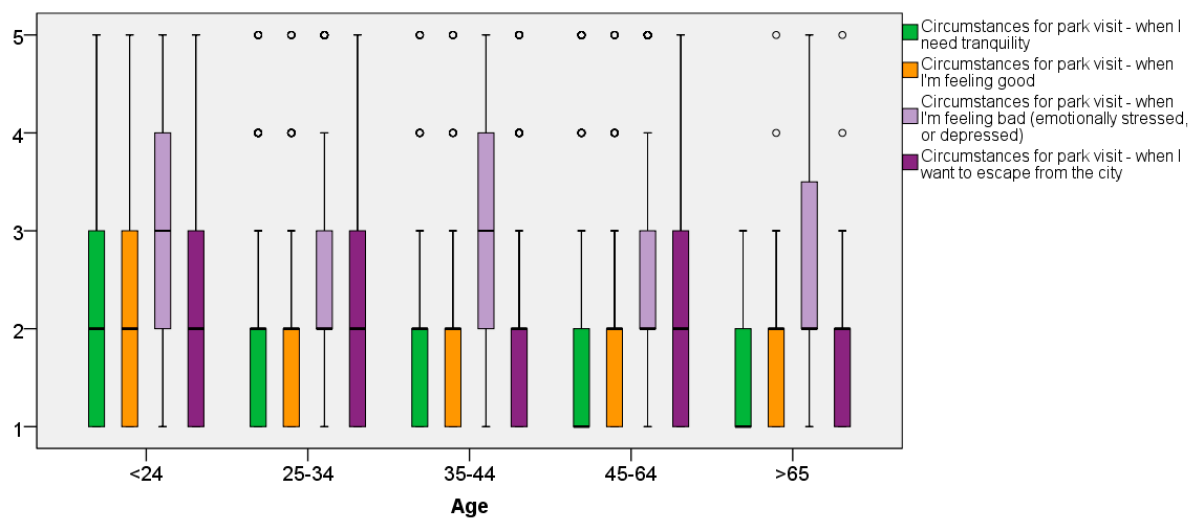

#### 4. Relationships between the circumstances to visit a PA and the type of PA

##### Descriptives

|                                                                                          |                   | N    | Mean | Std. Deviation | Std. Error |
|------------------------------------------------------------------------------------------|-------------------|------|------|----------------|------------|
| Circumstances for park visit - when I need tranquility                                   | Biosphere reserve | 466  | 2,20 | 1,234          | ,057       |
|                                                                                          | National park     | 459  | 1,91 | ,914           | ,043       |
|                                                                                          | Nature park       | 467  | 1,70 | ,910           | ,042       |
|                                                                                          | Total             | 1392 | 1,94 | 1,050          | ,028       |
| Circumstances for park visit - when I'm feeling good                                     | Biosphere reserve | 466  | 2,09 | ,995           | ,046       |
|                                                                                          | National park     | 459  | 1,97 | ,853           | ,040       |
|                                                                                          | Nature park       | 467  | 1,80 | ,797           | ,037       |
|                                                                                          | Total             | 1392 | 1,95 | ,893           | ,024       |
| Circumstances for park visit - when I'm feeling bad (emotionally stressed, or depressed) | Biosphere reserve | 466  | 2,79 | 1,298          | ,060       |
|                                                                                          | National park     | 459  | 2,79 | 1,209          | ,056       |
|                                                                                          | Nature park       | 467  | 2,36 | 1,118          | ,052       |
|                                                                                          | Total             | 1392 | 2,65 | 1,226          | ,033       |
| Circumstances for park visit - when I want to escape from the city                       | Biosphere reserve | 466  | 2,34 | 1,362          | ,063       |
|                                                                                          | National park     | 459  | 2,07 | 1,172          | ,055       |
|                                                                                          | Nature park       | 467  | 1,95 | 1,167          | ,054       |
|                                                                                          | Total             | 1392 | 2,12 | 1,247          | ,033       |

##### Descriptives

|                                                                                          |                   | 95% Confidence Interval for Mean |             |         |
|------------------------------------------------------------------------------------------|-------------------|----------------------------------|-------------|---------|
|                                                                                          |                   | Lower Bound                      | Upper Bound | Minimum |
| Circumstances for park visit - when I need tranquility                                   | Biosphere reserve | 2,09                             | 2,31        | 1       |
|                                                                                          | National park     | 1,82                             | 1,99        | 1       |
|                                                                                          | Nature park       | 1,62                             | 1,79        | 1       |
|                                                                                          | Total             | 1,88                             | 1,99        | 1       |
| Circumstances for park visit - when I'm feeling good                                     | Biosphere reserve | 2,00                             | 2,18        | 1       |
|                                                                                          | National park     | 1,89                             | 2,05        | 1       |
|                                                                                          | Nature park       | 1,73                             | 1,88        | 1       |
|                                                                                          | Total             | 1,91                             | 2,00        | 1       |
| Circumstances for park visit - when I'm feeling bad (emotionally stressed, or depressed) | Biosphere reserve | 2,67                             | 2,91        | 1       |
|                                                                                          | National park     | 2,68                             | 2,90        | 1       |
|                                                                                          | Nature park       | 2,26                             | 2,47        | 1       |
|                                                                                          | Total             | 2,58                             | 2,71        | 1       |
| Circumstances for park visit - when I want to escape from the city                       | Biosphere reserve | 2,22                             | 2,47        | 1       |
|                                                                                          | National park     | 1,96                             | 2,18        | 1       |
|                                                                                          | Nature park       | 1,84                             | 2,05        | 1       |
|                                                                                          | Total             | 2,06                             | 2,19        | 1       |



## Descriptives

|                                                                                             |                   | Maximum |
|---------------------------------------------------------------------------------------------|-------------------|---------|
| Circumstances for park visit - when I need tranquility                                      | Biosphere reserve | 5       |
|                                                                                             | National park     | 5       |
|                                                                                             | Nature park       | 5       |
|                                                                                             | Total             | 5       |
| Circumstances for park visit - when I'm feeling good                                        | Biosphere reserve | 5       |
|                                                                                             | National park     | 5       |
|                                                                                             | Nature park       | 5       |
|                                                                                             | Total             | 5       |
| Circumstances for park visit - when I'm feeling bad<br>(emotionally stressed, or depressed) | Biosphere reserve | 5       |
|                                                                                             | National park     | 5       |
|                                                                                             | Nature park       | 5       |
|                                                                                             | Total             | 5       |
| Circumstances for park visit - when I want to escape from the<br>city                       | Biosphere reserve | 5       |
|                                                                                             | National park     | 5       |
|                                                                                             | Nature park       | 5       |
|                                                                                             | Total             | 5       |

## ANOVA

|                                                                                                |                | Sum of Squares | df   | Mean Square | F      |
|------------------------------------------------------------------------------------------------|----------------|----------------|------|-------------|--------|
| Circumstances for park visit - when I<br>need tranquility                                      | Between Groups | 57,745         | 2    | 28,873      | 27,163 |
|                                                                                                | Within Groups  | 1476,436       | 1389 | 1,063       |        |
|                                                                                                | Total          | 1534,181       | 1391 |             |        |
| Circumstances for park visit - when<br>I'm feeling good                                        | Between Groups | 18,855         | 2    | 9,428       | 12,014 |
|                                                                                                | Within Groups  | 1090,015       | 1389 | ,785        |        |
|                                                                                                | Total          | 1108,871       | 1391 |             |        |
| Circumstances for park visit - when<br>I'm feeling bad (emotionally<br>stressed, or depressed) | Between Groups | 56,382         | 2    | 28,191      | 19,238 |
|                                                                                                | Within Groups  | 2035,428       | 1389 | 1,465       |        |
|                                                                                                | Total          | 2091,810       | 1391 |             |        |
| Circumstances for park visit - when I<br>want to escape from the city                          | Between Groups | 37,581         | 2    | 18,791      | 12,276 |
|                                                                                                | Within Groups  | 2126,143       | 1389 | 1,531       |        |
|                                                                                                | Total          | 2163,724       | 1391 |             |        |

## ANOVA

|                                                        |                | Sig. |
|--------------------------------------------------------|----------------|------|
| Circumstances for park visit - when I need tranquility | Between Groups | ,000 |
|                                                        | Within Groups  |      |
|                                                        | Total          |      |

|                                                                                          |                |      |
|------------------------------------------------------------------------------------------|----------------|------|
| Circumstances for park visit - when I'm feeling good                                     | Between Groups | ,000 |
|                                                                                          | Within Groups  |      |
|                                                                                          | Total          |      |
| Circumstances for park visit - when I'm feeling bad (emotionally stressed, or depressed) | Between Groups | ,000 |
|                                                                                          | Within Groups  |      |
|                                                                                          | Total          |      |
| Circumstances for park visit - when I want to escape from the city                       | Between Groups | ,000 |
|                                                                                          | Within Groups  |      |
|                                                                                          | Total          |      |

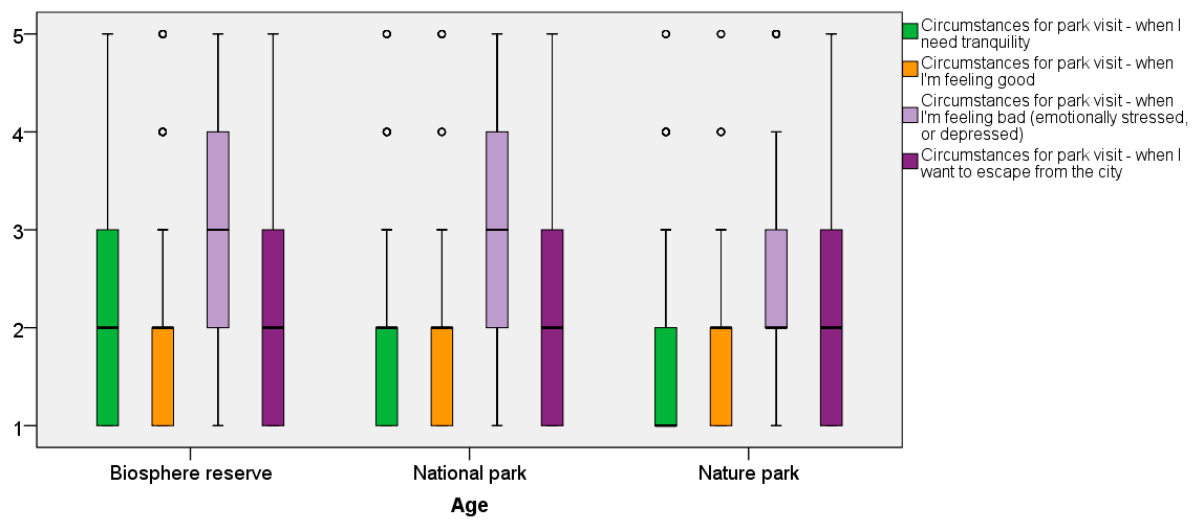

## 5. Relationships between the perceived benefits of visiting a PA and the type of PA

|                                                                 |                   | Descriptives |      |                |            |                                  |             |         |
|-----------------------------------------------------------------|-------------------|--------------|------|----------------|------------|----------------------------------|-------------|---------|
|                                                                 |                   | N            | Mean | Std. Deviation | Std. Error | 95% Confidence Interval for Mean |             | Minimum |
|                                                                 |                   |              |      |                |            | Lower Bound                      | Upper Bound |         |
| in this park there is a very healthy air quality                | Biosphere reserve | 466          | 1,67 | ,727           | ,034       | 1,60                             | 1,73        | 1       |
|                                                                 | National park     | 459          | 1,55 | ,732           | ,034       | 1,48                             | 1,62        | 1       |
|                                                                 | Nature park       | 467          | 1,62 | ,841           | ,039       | 1,54                             | 1,70        | 1       |
|                                                                 | Total             | 1392         | 1,61 | ,770           | ,021       | 1,57                             | 1,65        | 1       |
| wild nature makes me feel happy                                 | Biosphere reserve | 466          | 1,68 | ,758           | ,035       | 1,61                             | 1,75        | 1       |
|                                                                 | National park     | 459          | 1,65 | ,812           | ,038       | 1,58                             | 1,73        | 1       |
|                                                                 | Nature park       | 467          | 1,56 | ,771           | ,036       | 1,49                             | 1,63        | 1       |
|                                                                 | Total             | 1392         | 1,63 | ,781           | ,021       | 1,59                             | 1,67        | 1       |
| in protected areas the pollution is low                         | Biosphere reserve | 466          | 2,00 | ,860           | ,040       | 1,92                             | 2,07        | 1       |
|                                                                 | National park     | 459          | 2,05 | ,895           | ,042       | 1,97                             | 2,13        | 1       |
|                                                                 | Nature park       | 467          | 1,93 | ,916           | ,042       | 1,85                             | 2,01        | 1       |
|                                                                 | Total             | 1392         | 1,99 | ,891           | ,024       | 1,94                             | 2,04        | 1       |
| to stay in contact with nature let's me forget my daily worries | Biosphere reserve | 466          | 2,02 | ,917           | ,042       | 1,94                             | 2,10        | 1       |
|                                                                 | National park     | 459          | 1,97 | ,925           | ,043       | 1,89                             | 2,06        | 1       |
|                                                                 | Nature park       | 467          | 1,95 | ,924           | ,043       | 1,86                             | 2,03        | 1       |
|                                                                 | Total             | 1392         | 1,98 | ,922           | ,025       | 1,93                             | 2,03        | 1       |
| a stay in a potected area increases my wellbeing                | Biosphere reserve | 466          | 1,92 | ,880           | ,041       | 1,84                             | 2,00        | 1       |
|                                                                 | National park     | 459          | 1,83 | ,901           | ,042       | 1,75                             | 1,91        | 1       |
|                                                                 | Nature park       | 467          | 1,76 | ,894           | ,041       | 1,68                             | 1,84        | 1       |
|                                                                 | Total             | 1392         | 1,84 | ,893           | ,024       | 1,79                             | 1,88        | 1       |
| wild nature makes me feel free                                  | Biosphere reserve | 466          | 1,98 | ,933           | ,043       | 1,90                             | 2,07        | 1       |
|                                                                 | National park     | 459          | 2,02 | 1,088          | ,051       | 1,92                             | 2,12        | 1       |
|                                                                 | Nature park       | 467          | 1,91 | 1,025          | ,047       | 1,82                             | 2,00        | 1       |
|                                                                 | Total             | 1392         | 1,97 | 1,017          | ,027       | 1,92                             | 2,02        | 1       |
| in wild nature i am anxious, because i get lost                 | Biosphere reserve | 466          | 3,65 | 1,255          | ,058       | 3,53                             | 3,76        | 1       |
|                                                                 | National park     | 459          | 3,67 | 1,262          | ,059       | 3,55                             | 3,78        | 1       |
|                                                                 | Nature park       | 467          | 3,57 | 1,310          | ,061       | 3,45                             | 3,69        | 1       |
|                                                                 | Total             | 1392         | 3,63 | 1,276          | ,034       | 3,56                             | 3,69        | 1       |
| a stay in this park is healthy for me                           | Biosphere reserve | 466          | 1,75 | ,782           | ,036       | 1,68                             | 1,82        | 1       |
|                                                                 | National park     | 459          | 1,77 | ,849           | ,040       | 1,69                             | 1,84        | 1       |
|                                                                 | Nature park       | 467          | 1,80 | ,906           | ,042       | 1,71                             | 1,88        | 1       |
|                                                                 | Total             | 1392         | 1,77 | ,847           | ,023       | 1,73                             | 1,82        | 1       |
| protected areas are important for personal wellbeing            | Biosphere reserve | 466          | 1,93 | ,864           | ,040       | 1,85                             | 2,01        | 1       |
|                                                                 | National park     | 459          | 1,87 | ,863           | ,040       | 1,79                             | 1,95        | 1       |
|                                                                 | Nature park       | 467          | 1,84 | ,866           | ,040       | 1,76                             | 1,91        | 1       |
|                                                                 | Total             | 1392         | 1,88 | ,865           | ,023       | 1,83                             | 1,92        | 1       |

|                                                                        |                   |      |      |      |      |      |      |   |
|------------------------------------------------------------------------|-------------------|------|------|------|------|------|------|---|
| a stay in nature makes me feel relaxed (Formulierung vergleichen)      | Biosphere reserve | 466  | 1,75 | ,737 | ,034 | 1,69 | 1,82 | 1 |
|                                                                        | National park     | 459  | 1,71 | ,783 | ,037 | 1,64 | 1,78 | 1 |
|                                                                        | Nature park       | 467  | 1,64 | ,768 | ,036 | 1,57 | 1,71 | 1 |
|                                                                        | Total             | 1392 | 1,70 | ,764 | ,020 | 1,66 | 1,74 | 1 |
| to stay in contact with nature recharges my battery                    | Biosphere reserve | 466  | 1,76 | ,848 | ,039 | 1,69 | 1,84 | 1 |
|                                                                        | National park     | 459  | 1,79 | ,824 | ,038 | 1,72 | 1,87 | 1 |
|                                                                        | Nature park       | 467  | 1,73 | ,850 | ,039 | 1,66 | 1,81 | 1 |
|                                                                        | Total             | 1392 | 1,76 | ,841 | ,023 | 1,72 | 1,81 | 1 |
| to stay in contact with nature restores my pshychophysical equilibrium | Biosphere reserve | 466  | 1,87 | ,869 | ,040 | 1,79 | 1,95 | 1 |
|                                                                        | National park     | 459  | 1,92 | ,894 | ,042 | 1,83 | 2,00 | 1 |
|                                                                        | Nature park       | 467  | 1,81 | ,863 | ,040 | 1,73 | 1,89 | 1 |
|                                                                        | Total             | 1392 | 1,87 | ,876 | ,023 | 1,82 | 1,91 | 1 |

### Descriptives

|                                                                 |                   | Maximum |
|-----------------------------------------------------------------|-------------------|---------|
| in this park there is a very healthy air quality                | Biosphere reserve | 4       |
|                                                                 | National park     | 5       |
|                                                                 | Nature park       | 5       |
|                                                                 | Total             | 5       |
| wild nature makes me feel happy                                 | Biosphere reserve | 5       |
|                                                                 | National park     | 5       |
|                                                                 | Nature park       | 5       |
|                                                                 | Total             | 5       |
| in protected areas the pollution is low                         | Biosphere reserve | 5       |
|                                                                 | National park     | 5       |
|                                                                 | Nature park       | 5       |
|                                                                 | Total             | 5       |
| to stay in contact with nature let's me forget my daily worries | Biosphere reserve | 5       |
|                                                                 | National park     | 5       |
|                                                                 | Nature park       | 5       |
|                                                                 | Total             | 5       |
| a stay in a potected area increases my wellbeing                | Biosphere reserve | 5       |
|                                                                 | National park     | 5       |
|                                                                 | Nature park       | 5       |
|                                                                 | Total             | 5       |
| wild nature makes me feel free                                  | Biosphere reserve | 5       |
|                                                                 | National park     | 5       |
|                                                                 | Nature park       | 5       |
|                                                                 | Total             | 5       |
| in wild nature i am anxious, because i get lost                 | Biosphere reserve | 5       |
|                                                                 | National park     | 5       |
|                                                                 | Nature park       | 5       |

|                                                                       |                   |   |
|-----------------------------------------------------------------------|-------------------|---|
|                                                                       | Total             | 5 |
| a stay in this park is healthy for me                                 | Biosphere reserve | 5 |
|                                                                       | National park     | 5 |
|                                                                       | Nature park       | 5 |
|                                                                       | Total             | 5 |
| protected areas are important for personal wellbeing                  | Biosphere reserve | 5 |
|                                                                       | National park     | 5 |
|                                                                       | Nature park       | 5 |
|                                                                       | Total             | 5 |
| a stay in nature makes me feel relaxed (Formulierung vergleichen)     | Biosphere reserve | 5 |
|                                                                       | National park     | 5 |
|                                                                       | Nature park       | 5 |
|                                                                       | Total             | 5 |
| to stay in contact with nature recharges my battery                   | Biosphere reserve | 5 |
|                                                                       | National park     | 5 |
|                                                                       | Nature park       | 5 |
|                                                                       | Total             | 5 |
| to stay in contact with nature restores my psychophysical equilibrium | Biosphere reserve | 5 |
|                                                                       | National park     | 5 |
|                                                                       | Nature park       | 5 |
|                                                                       | Total             | 5 |

### ANOVA

|                                                                 |                | Sum of Squares | df   | Mean Square | F     | Sig. |
|-----------------------------------------------------------------|----------------|----------------|------|-------------|-------|------|
| in this park there is a very healthy air quality                | Between Groups | 3,277          | 2    | 1,639       | 2,773 | ,063 |
|                                                                 | Within Groups  | 821,390        | 1390 | ,591        |       |      |
|                                                                 | Total          | 824,668        | 1392 |             |       |      |
| wild nature makes me feel happy                                 | Between Groups | 3,835          | 2    | 1,918       | 3,150 | ,043 |
|                                                                 | Within Groups  | 846,242        | 1390 | ,609        |       |      |
|                                                                 | Total          | 850,078        | 1392 |             |       |      |
| in protected areas the pollution is low                         | Between Groups | 3,148          | 2    | 1,574       | 1,984 | ,138 |
|                                                                 | Within Groups  | 1102,749       | 1390 | ,793        |       |      |
|                                                                 | Total          | 1105,897       | 1392 |             |       |      |
| to stay in contact with nature let's me forget my daily worries | Between Groups | 1,195          | 2    | ,597        | ,703  | ,495 |
|                                                                 | Within Groups  | 1181,282       | 1390 | ,850        |       |      |
|                                                                 | Total          | 1182,477       | 1392 |             |       |      |
| a stay in a protected area increases my wellbeing               | Between Groups | 6,020          | 2    | 3,010       | 3,788 | ,023 |
|                                                                 | Within Groups  | 1104,662       | 1390 | ,795        |       |      |
|                                                                 | Total          | 1110,682       | 1392 |             |       |      |
| wild nature makes me feel free                                  | Between Groups | 2,954          | 2    | 1,477       | 1,429 | ,240 |
|                                                                 | Within Groups  | 1436,839       | 1390 | 1,034       |       |      |

|                                                                              |                |          |      |       |       |      |
|------------------------------------------------------------------------------|----------------|----------|------|-------|-------|------|
|                                                                              | Total          | 1439,793 | 1392 |       |       |      |
| in wild nature i am anxious,<br>because i get lost                           | Between Groups | 2,698    | 2    | 1,349 | ,829  | ,437 |
|                                                                              | Within Groups  | 2263,188 | 1390 | 1,628 |       |      |
|                                                                              | Total          | 2265,887 | 1392 |       |       |      |
| a stay in this park is healthy for<br>me                                     | Between Groups | ,562     | 2    | ,281  | ,391  | ,676 |
|                                                                              | Within Groups  | 997,334  | 1389 | ,718  |       |      |
|                                                                              | Total          | 997,896  | 1391 |       |       |      |
| protected areas are important for<br>personal wellbeing                      | Between Groups | 2,019    | 2    | 1,009 | 1,351 | ,259 |
|                                                                              | Within Groups  | 1038,744 | 1390 | ,747  |       |      |
|                                                                              | Total          | 1040,762 | 1392 |       |       |      |
| a stay in nature makes me feel<br>relaxed (Formulierung<br>vergleichen)      | Between Groups | 2,977    | 2    | 1,488 | 2,557 | ,078 |
|                                                                              | Within Groups  | 809,193  | 1390 | ,582  |       |      |
|                                                                              | Total          | 812,169  | 1392 |       |       |      |
| to stay in contact with nature<br>recharges my battery                       | Between Groups | ,838     | 2    | ,419  | ,593  | ,553 |
|                                                                              | Within Groups  | 982,985  | 1390 | ,707  |       |      |
|                                                                              | Total          | 983,823  | 1392 |       |       |      |
| to stay in contact with nature<br>restores my pshychophysical<br>equilibrium | Between Groups | 2,495    | 2    | 1,248 | 1,629 | ,197 |
|                                                                              | Within Groups  | 1064,669 | 1390 | ,766  |       |      |
|                                                                              | Total          | 1067,164 | 1392 |       |       |      |

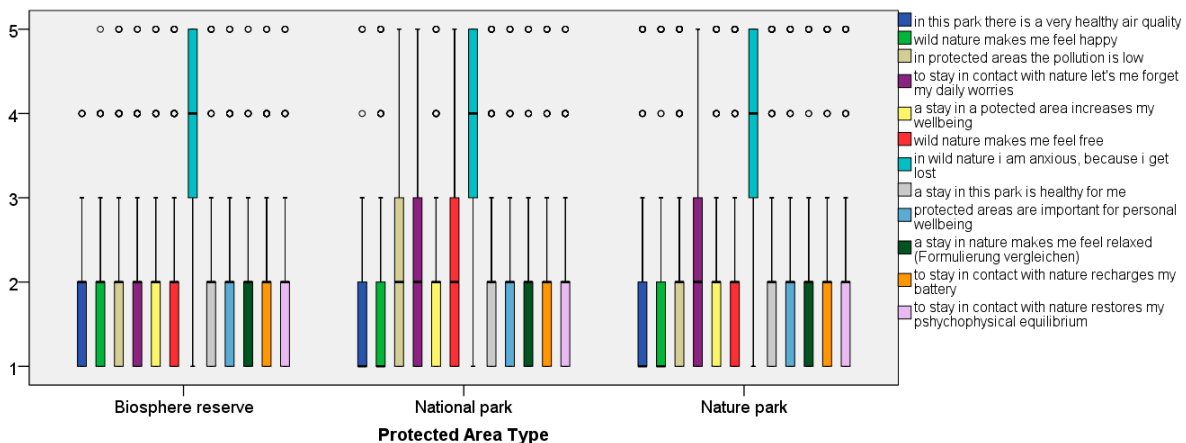

## 6. Relationships between the perceived benefits of visiting a PA and visitor age

### ANOVA

|                                                                         |                | Sum of Squares | df   | Mean Square | F      | Sig. |
|-------------------------------------------------------------------------|----------------|----------------|------|-------------|--------|------|
| in this park there is a very healthy air quality                        | Between Groups | 8,009          | 4    | 2,002       | 3,403  | ,009 |
|                                                                         | Within Groups  | 816,659        | 1388 | ,588        |        |      |
|                                                                         | Total          | 824,668        | 1392 |             |        |      |
| wild nature makes me feel happy                                         | Between Groups | 7,153          | 4    | 1,788       | 2,945  | ,019 |
|                                                                         | Within Groups  | 842,925        | 1388 | ,607        |        |      |
|                                                                         | Total          | 850,078        | 1392 |             |        |      |
| in protected areas the pollution is low                                 | Between Groups | 2,938          | 4    | ,734        | ,924   | ,449 |
|                                                                         | Within Groups  | 1102,959       | 1388 | ,795        |        |      |
|                                                                         | Total          | 1105,897       | 1392 |             |        |      |
| to stay in contact with nature let's me forget my daily worries         | Between Groups | 31,931         | 4    | 7,983       | 9,630  | ,000 |
|                                                                         | Within Groups  | 1150,546       | 1388 | ,829        |        |      |
|                                                                         | Total          | 1182,477       | 1392 |             |        |      |
| a stay in a protected area increases my wellbeing                       | Between Groups | 32,665         | 4    | 8,166       | 10,514 | ,000 |
|                                                                         | Within Groups  | 1078,017       | 1388 | ,777        |        |      |
|                                                                         | Total          | 1110,682       | 1392 |             |        |      |
| wild nature makes me feel free                                          | Between Groups | 21,046         | 4    | 5,262       | 5,148  | ,000 |
|                                                                         | Within Groups  | 1418,747       | 1388 | 1,022       |        |      |
|                                                                         | Total          | 1439,793       | 1392 |             |        |      |
| in wild nature i am anxious, because i get lost                         | Between Groups | 16,407         | 4    | 4,102       | 2,531  | ,039 |
|                                                                         | Within Groups  | 2249,480       | 1388 | 1,621       |        |      |
|                                                                         | Total          | 2265,887       | 1392 |             |        |      |
| a stay in this park is healthy for me                                   | Between Groups | 3,916          | 4    | ,979        | 1,366  | ,243 |
|                                                                         | Within Groups  | 993,979        | 1387 | ,717        |        |      |
|                                                                         | Total          | 997,896        | 1391 |             |        |      |
| protected areas are important for personal wellbeing                    | Between Groups | 28,158         | 4    | 7,040       | 9,649  | ,000 |
|                                                                         | Within Groups  | 1012,604       | 1388 | ,730        |        |      |
|                                                                         | Total          | 1040,762       | 1392 |             |        |      |
| a stay in nature makes me feel relaxed (Formulierung vergleichen)       | Between Groups | 8,722          | 4    | 2,181       | 3,767  | ,005 |
|                                                                         | Within Groups  | 803,447        | 1388 | ,579        |        |      |
|                                                                         | Total          | 812,169        | 1392 |             |        |      |
| to stay in contact with nature recharges my battery                     | Between Groups | 20,842         | 4    | 5,210       | 7,510  | ,000 |
|                                                                         | Within Groups  | 962,982        | 1388 | ,694        |        |      |
|                                                                         | Total          | 983,823        | 1392 |             |        |      |
| to stay in contact with nature restores my pshycho-physical equilibrium | Between Groups | 24,016         | 4    | 6,004       | 7,989  | ,000 |
|                                                                         | Within Groups  | 1043,149       | 1388 | ,752        |        |      |
|                                                                         | Total          | 1067,164       | 1392 |             |        |      |

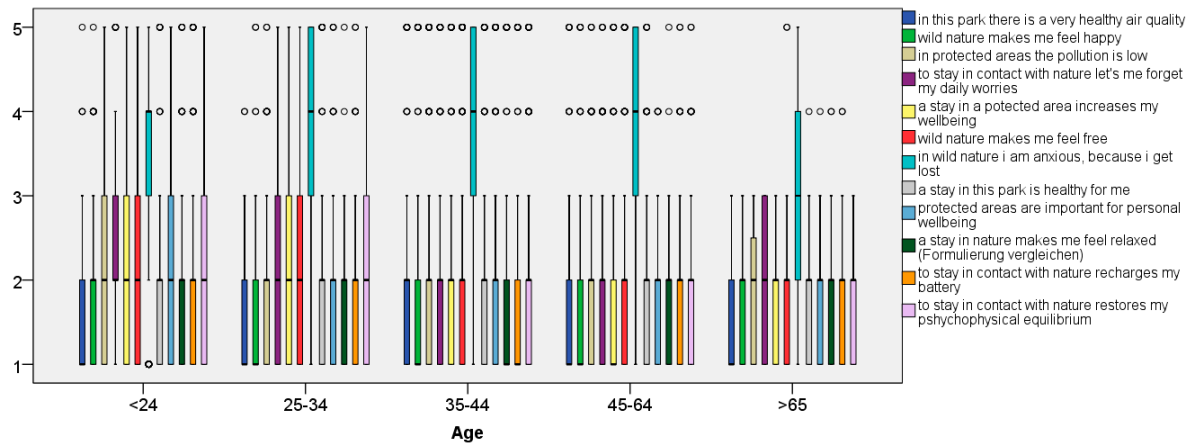

## 7. Relationships between the symptoms improved by stay in PA and visitor age

### Descriptives

|                                                                                      |       | N    | Mean | Std. Deviation | Std. Error | 95% Confidence Interval for Mean |             | Minimum | Maximum |
|--------------------------------------------------------------------------------------|-------|------|------|----------------|------------|----------------------------------|-------------|---------|---------|
|                                                                                      |       |      |      |                |            | Lower Bound                      | Upper Bound |         |         |
| Symptoms that can be reduced by contact with nature - Irritability                   | <24   | 316  | 1,87 | ,826           | ,046       | 1,78                             | 1,96        | 1       | 5       |
|                                                                                      | 25-34 | 316  | 1,79 | ,762           | ,043       | 1,70                             | 1,87        | 1       | 5       |
|                                                                                      | 35-44 | 300  | 1,58 | ,725           | ,042       | 1,50                             | 1,66        | 1       | 5       |
|                                                                                      | 45-64 | 391  | 1,56 | ,680           | ,034       | 1,49                             | 1,63        | 1       | 4       |
|                                                                                      | >65   | 67   | 1,67 | ,705           | ,086       | 1,50                             | 1,84        | 1       | 3       |
|                                                                                      | Total | 1390 | 1,69 | ,755           | ,020       | 1,65                             | 1,73        | 1       | 5       |
| Symptoms that can be reduced by contact with nature - Lack of ability to concentrate | <24   | 316  | 2,17 | ,913           | ,051       | 2,07                             | 2,27        | 1       | 5       |
|                                                                                      | 25-34 | 316  | 1,96 | ,786           | ,044       | 1,87                             | 2,05        | 1       | 5       |
|                                                                                      | 35-44 | 300  | 1,91 | ,899           | ,052       | 1,80                             | 2,01        | 1       | 5       |
|                                                                                      | 45-64 | 391  | 1,85 | ,848           | ,043       | 1,77                             | 1,94        | 1       | 5       |
|                                                                                      | >65   | 67   | 1,91 | ,668           | ,082       | 1,75                             | 2,07        | 1       | 3       |
|                                                                                      | Total | 1390 | 1,96 | ,860           | ,023       | 1,92                             | 2,01        | 1       | 5       |
| Symptoms that can be reduced by contact with nature - Insomnia                       | <24   | 316  | 2,46 | ,923           | ,052       | 2,36                             | 2,56        | 1       | 5       |
|                                                                                      | 25-34 | 316  | 2,21 | ,846           | ,048       | 2,11                             | 2,30        | 1       | 5       |
|                                                                                      | 35-44 | 301  | 2,15 | 1,018          | ,059       | 2,04                             | 2,27        | 1       | 5       |
|                                                                                      | 45-64 | 390  | 2,05 | ,964           | ,049       | 1,95                             | 2,14        | 1       | 5       |
|                                                                                      | >65   | 67   | 2,21 | ,686           | ,084       | 2,04                             | 2,38        | 1       | 4       |
|                                                                                      | Total | 1390 | 2,21 | ,941           | ,025       | 2,16                             | 2,26        | 1       | 5       |
| Symptoms that can be reduced by contact with nature - Muscular tension               | <24   | 316  | 2,82 | 1,093          | ,061       | 2,70                             | 2,94        | 1       | 5       |
|                                                                                      | 25-34 | 313  | 2,39 | ,917           | ,052       | 2,28                             | 2,49        | 1       | 5       |
|                                                                                      | 35-44 | 301  | 2,32 | 1,023          | ,059       | 2,21                             | 2,44        | 1       | 5       |
|                                                                                      | 45-64 | 387  | 2,19 | ,951           | ,048       | 2,09                             | 2,28        | 1       | 5       |
|                                                                                      | >65   | 67   | 2,07 | ,804           | ,098       | 1,88                             | 2,27        | 1       | 4       |
|                                                                                      | Total | 1384 | 2,40 | 1,016          | ,027       | 2,35                             | 2,46        | 1       | 5       |



|                                                                         |       |      |      |       |      |      |      |   |   |
|-------------------------------------------------------------------------|-------|------|------|-------|------|------|------|---|---|
| Symptoms that can be reduced by contact with nature - Pain              | <24   | 316  | 2,70 | 1,015 | ,057 | 2,59 | 2,81 | 1 | 5 |
|                                                                         | 25-34 | 316  | 2,49 | ,934  | ,053 | 2,39 | 2,60 | 1 | 5 |
|                                                                         | 35-44 | 301  | 2,43 | 1,036 | ,060 | 2,31 | 2,55 | 1 | 5 |
|                                                                         | 45-64 | 388  | 2,39 | 1,084 | ,055 | 2,29 | 2,50 | 1 | 5 |
|                                                                         | >65   | 67   | 2,70 | ,985  | ,120 | 2,46 | 2,94 | 1 | 5 |
|                                                                         | Total | 1388 | 2,51 | 1,026 | ,028 | 2,46 | 2,56 | 1 | 5 |
| Symptoms that can be reduced by contact with nature - General anxiety   | <24   | 315  | 2,23 | ,942  | ,053 | 2,13 | 2,34 | 1 | 5 |
|                                                                         | 25-34 | 316  | 2,06 | ,905  | ,051 | 1,96 | 2,16 | 1 | 5 |
|                                                                         | 35-44 | 301  | 1,97 | ,923  | ,053 | 1,87 | 2,08 | 1 | 5 |
|                                                                         | 45-64 | 390  | 1,89 | ,856  | ,043 | 1,80 | 1,97 | 1 | 5 |
|                                                                         | >65   | 67   | 1,84 | ,593  | ,072 | 1,69 | 1,98 | 1 | 3 |
|                                                                         | Total | 1389 | 2,02 | ,900  | ,024 | 1,97 | 2,07 | 1 | 5 |
| Symptoms that can be reduced by contact with nature - Depression        | <24   | 316  | 2,05 | ,958  | ,054 | 1,94 | 2,16 | 1 | 5 |
|                                                                         | 25-34 | 316  | 2,15 | ,995  | ,056 | 2,04 | 2,26 | 1 | 5 |
|                                                                         | 35-44 | 301  | 1,98 | ,995  | ,057 | 1,87 | 2,10 | 1 | 5 |
|                                                                         | 45-64 | 391  | 2,06 | 1,042 | ,053 | 1,96 | 2,17 | 1 | 5 |
|                                                                         | >65   | 67   | 2,10 | ,761  | ,093 | 1,92 | 2,29 | 1 | 4 |
|                                                                         | Total | 1391 | 2,06 | ,991  | ,027 | 2,01 | 2,12 | 1 | 5 |
| Symptoms that can be reduced by contact with nature - Short term memory | <24   | 317  | 2,96 | 1,103 | ,062 | 2,84 | 3,08 | 1 | 5 |
|                                                                         | 25-34 | 316  | 2,76 | 1,096 | ,062 | 2,64 | 2,88 | 1 | 5 |
|                                                                         | 35-44 | 301  | 2,73 | 1,098 | ,063 | 2,60 | 2,85 | 1 | 5 |
|                                                                         | 45-64 | 386  | 2,55 | 1,143 | ,058 | 2,44 | 2,67 | 1 | 5 |
|                                                                         | >65   | 67   | 2,75 | ,990  | ,121 | 2,50 | 2,99 | 1 | 5 |
|                                                                         | Total | 1387 | 2,74 | 1,114 | ,030 | 2,68 | 2,80 | 1 | 5 |

### ANOVA

|                                                                                      |                | Sum of Squares | df   | Mean Square | F      |
|--------------------------------------------------------------------------------------|----------------|----------------|------|-------------|--------|
| Symptoms that can be reduced by contact with nature - Irritability                   | Between Groups | 23,903         | 4    | 5,976       | 10,778 |
|                                                                                      | Within Groups  | 767,925        | 1385 | ,554        |        |
|                                                                                      | Total          | 791,828        | 1389 |             |        |
| Symptoms that can be reduced by contact with nature - Lack of ability to concentrate | Between Groups | 19,424         | 4    | 4,856       | 6,667  |
|                                                                                      | Within Groups  | 1008,777       | 1385 | ,728        |        |
|                                                                                      | Total          | 1028,201       | 1389 |             |        |
| Symptoms that can be reduced by contact with nature - Insomnia                       | Between Groups | 31,525         | 4    | 7,881       | 9,116  |
|                                                                                      | Within Groups  | 1197,388       | 1385 | ,865        |        |
|                                                                                      | Total          | 1228,913       | 1389 |             |        |
| Symptoms that can be reduced by contact with nature - Muscular tension               | Between Groups | 82,739         | 4    | 20,685      | 21,225 |
|                                                                                      | Within Groups  | 1343,897       | 1379 | ,975        |        |
|                                                                                      | Total          | 1426,636       | 1383 |             |        |
| Symptoms that can be reduced by contact with nature - Pain                           | Between Groups | 20,900         | 4    | 5,225       | 5,018  |
|                                                                                      | Within Groups  | 1439,978       | 1383 | 1,041       |        |

|                                                                         |                |          |      |       |       |
|-------------------------------------------------------------------------|----------------|----------|------|-------|-------|
|                                                                         | Total          | 1460,878 | 1387 |       |       |
| Symptoms that can be reduced by contact with nature - General anxiety   | Between Groups | 24,861   | 4    | 6,215 | 7,817 |
|                                                                         | Within Groups  | 1100,491 | 1384 | ,795  |       |
|                                                                         | Total          | 1125,352 | 1388 |       |       |
| Symptoms that can be reduced by contact with nature - Depression        | Between Groups | 4,390    | 4    | 1,098 | 1,119 |
|                                                                         | Within Groups  | 1359,787 | 1386 | ,981  |       |
|                                                                         | Total          | 1364,177 | 1390 |       |       |
| Symptoms that can be reduced by contact with nature - Short term memory | Between Groups | 28,632   | 4    | 7,158 | 5,845 |
|                                                                         | Within Groups  | 1692,409 | 1382 | 1,225 |       |
|                                                                         | Total          | 1721,041 | 1386 |       |       |

### ANOVA

|                                                                                      |                | Sig. |
|--------------------------------------------------------------------------------------|----------------|------|
| Symptoms that can be reduced by contact with nature - Irritability                   | Between Groups | ,000 |
|                                                                                      | Within Groups  |      |
|                                                                                      | Total          |      |
| Symptoms that can be reduced by contact with nature - Lack of ability to concentrate | Between Groups | ,000 |
|                                                                                      | Within Groups  |      |
|                                                                                      | Total          |      |
| Symptoms that can be reduced by contact with nature - Insomnia                       | Between Groups | ,000 |
|                                                                                      | Within Groups  |      |
|                                                                                      | Total          |      |
| Symptoms that can be reduced by contact with nature - Muscular tension               | Between Groups | ,000 |
|                                                                                      | Within Groups  |      |
|                                                                                      | Total          |      |
| Symptoms that can be reduced by contact with nature - Pain                           | Between Groups | ,001 |
|                                                                                      | Within Groups  |      |
|                                                                                      | Total          |      |
| Symptoms that can be reduced by contact with nature - General anxiety                | Between Groups | ,000 |
|                                                                                      | Within Groups  |      |
|                                                                                      | Total          |      |
| Symptoms that can be reduced by contact with nature - Depression                     | Between Groups | ,346 |
|                                                                                      | Within Groups  |      |
|                                                                                      | Total          |      |
| Symptoms that can be reduced by contact with nature - Short term memory              | Between Groups | ,000 |
|                                                                                      | Within Groups  |      |
|                                                                                      | Total          |      |

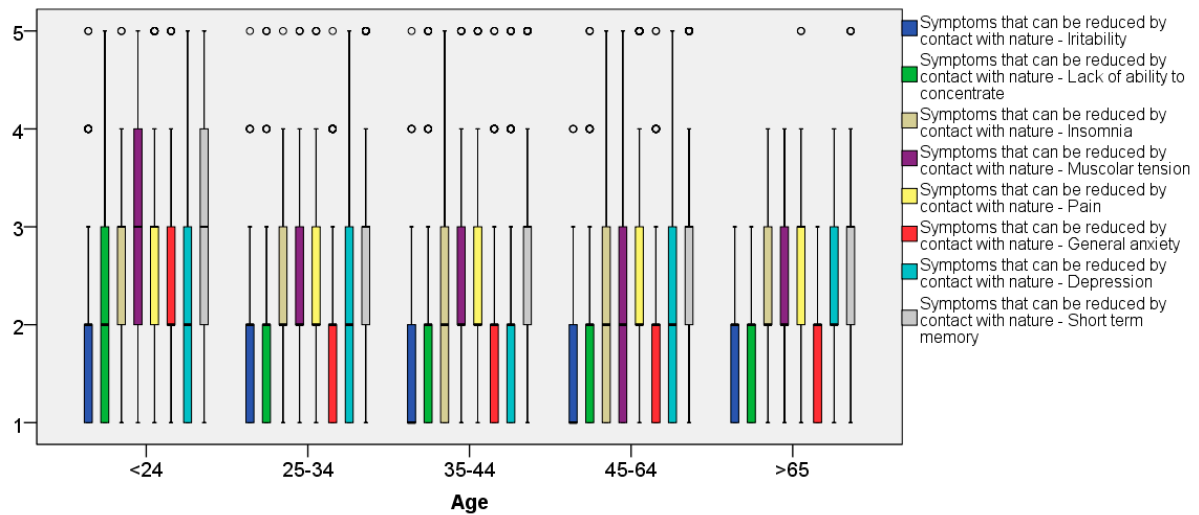

## 8. Relationships between the symptoms improved by stay in PA and the type of PA

### Descriptives

|                                                                                      |                   | N    | Mean | Std. Deviation | Std. Error |
|--------------------------------------------------------------------------------------|-------------------|------|------|----------------|------------|
| Symptoms that can be reduced by contact with nature - Irritability                   | Biosphere reserve | 465  | 1,78 | ,843           | ,039       |
|                                                                                      | National park     | 459  | 1,73 | ,734           | ,034       |
|                                                                                      | Nature park       | 466  | 1,57 | ,663           | ,031       |
|                                                                                      | Total             | 1390 | 1,69 | ,755           | ,020       |
| Symptoms that can be reduced by contact with nature - Lack of ability to concentrate | Biosphere reserve | 464  | 2,03 | ,868           | ,040       |
|                                                                                      | National park     | 459  | 1,98 | ,865           | ,040       |
|                                                                                      | Nature park       | 467  | 1,88 | ,844           | ,039       |
|                                                                                      | Total             | 1390 | 1,96 | ,860           | ,023       |
| Symptoms that can be reduced by contact with nature - Insomnia                       | Biosphere reserve | 464  | 2,30 | ,956           | ,044       |
|                                                                                      | National park     | 459  | 2,21 | ,934           | ,044       |
|                                                                                      | Nature park       | 467  | 2,12 | ,925           | ,043       |
|                                                                                      | Total             | 1390 | 2,21 | ,941           | ,025       |
| Symptoms that can be reduced by contact with nature - Muscular tension               | Biosphere reserve | 462  | 2,42 | 1,015          | ,047       |
|                                                                                      | National park     | 459  | 2,52 | 1,012          | ,047       |
|                                                                                      | Nature park       | 463  | 2,27 | 1,008          | ,047       |
|                                                                                      | Total             | 1384 | 2,40 | 1,016          | ,027       |
| Symptoms that can be reduced by contact with nature - Pain                           | Biosphere reserve | 462  | 2,57 | 1,074          | ,050       |
|                                                                                      | National park     | 459  | 2,57 | 1,005          | ,047       |
|                                                                                      | Nature park       | 467  | 2,39 | ,991           | ,046       |
|                                                                                      | Total             | 1388 | 2,51 | 1,026          | ,028       |
| Symptoms that can be reduced by contact with nature - General anxiety                | Biosphere reserve | 463  | 2,07 | ,948           | ,044       |
|                                                                                      | National park     | 459  | 2,12 | ,922           | ,043       |
|                                                                                      | Nature park       | 467  | 1,88 | ,811           | ,038       |
|                                                                                      | Total             | 1389 | 2,02 | ,900           | ,024       |
| Symptoms that can be reduced by contact with nature - Short term memory              | Biosphere reserve | 465  | 2,13 | 1,058          | ,049       |

|                                                                         |                   |      |       |       |      |
|-------------------------------------------------------------------------|-------------------|------|-------|-------|------|
| contact with nature - Depression                                        | National park     | 459  | 2,11  | ,943  | ,044 |
|                                                                         | Nature park       | 467  | 1,95  | ,959  | ,044 |
|                                                                         | Total             | 1391 | 2,06  | ,991  | ,027 |
| Symptoms that can be reduced by contact with nature - Short term memory | Biosphere reserve | 464  | 2,71  | 1,069 | ,050 |
|                                                                         | National park     | 459  | 2,89  | 1,142 | ,053 |
|                                                                         | Nature park       | 464  | 2,62  | 1,115 | ,052 |
| Total                                                                   | 1387              | 2,74 | 1,114 | ,030  |      |

### Descriptives

|                                                                                      |                   | 95% Confidence Interval for Mean |             |         |         |
|--------------------------------------------------------------------------------------|-------------------|----------------------------------|-------------|---------|---------|
|                                                                                      |                   | Lower Bound                      | Upper Bound | Minimum | Maximum |
| Symptoms that can be reduced by contact with nature - Irritability                   | Biosphere reserve | 1,70                             | 1,86        | 1       | 5       |
|                                                                                      | National park     | 1,66                             | 1,80        | 1       | 4       |
|                                                                                      | Nature park       | 1,51                             | 1,63        | 1       | 5       |
|                                                                                      | Total             | 1,65                             | 1,73        | 1       | 5       |
| Symptoms that can be reduced by contact with nature - Lack of ability to concentrate | Biosphere reserve | 1,95                             | 2,11        | 1       | 5       |
|                                                                                      | National park     | 1,90                             | 2,06        | 1       | 5       |
|                                                                                      | Nature park       | 1,81                             | 1,96        | 1       | 5       |
|                                                                                      | Total             | 1,92                             | 2,01        | 1       | 5       |
| Symptoms that can be reduced by contact with nature - Insomnia                       | Biosphere reserve | 2,21                             | 2,39        | 1       | 5       |
|                                                                                      | National park     | 2,12                             | 2,29        | 1       | 5       |
|                                                                                      | Nature park       | 2,03                             | 2,20        | 1       | 5       |
|                                                                                      | Total             | 2,16                             | 2,26        | 1       | 5       |
| Symptoms that can be reduced by contact with nature - Muscular tension               | Biosphere reserve | 2,33                             | 2,51        | 1       | 5       |
|                                                                                      | National park     | 2,42                             | 2,61        | 1       | 5       |
|                                                                                      | Nature park       | 2,18                             | 2,36        | 1       | 5       |
|                                                                                      | Total             | 2,35                             | 2,46        | 1       | 5       |
| Symptoms that can be reduced by contact with nature - Pain                           | Biosphere reserve | 2,47                             | 2,67        | 1       | 5       |
|                                                                                      | National park     | 2,48                             | 2,66        | 1       | 5       |
|                                                                                      | Nature park       | 2,30                             | 2,48        | 1       | 5       |
|                                                                                      | Total             | 2,46                             | 2,56        | 1       | 5       |
| Symptoms that can be reduced by contact with nature - General anxiety                | Biosphere reserve | 1,98                             | 2,15        | 1       | 5       |
|                                                                                      | National park     | 2,03                             | 2,20        | 1       | 5       |
|                                                                                      | Nature park       | 1,81                             | 1,96        | 1       | 5       |
|                                                                                      | Total             | 1,97                             | 2,07        | 1       | 5       |
| Symptoms that can be reduced by contact with nature - Depression                     | Biosphere reserve | 2,03                             | 2,23        | 1       | 5       |
|                                                                                      | National park     | 2,02                             | 2,20        | 1       | 5       |
|                                                                                      | Nature park       | 1,87                             | 2,04        | 1       | 5       |
|                                                                                      | Total             | 2,01                             | 2,12        | 1       | 5       |
| Symptoms that can be reduced by contact with nature - Short term memory              | Biosphere reserve | 2,61                             | 2,81        | 1       | 5       |
|                                                                                      | National park     | 2,79                             | 3,00        | 1       | 5       |
|                                                                                      | Nature park       | 2,51                             | 2,72        | 1       | 5       |
|                                                                                      | Total             | 2,68                             | 2,80        | 1       | 5       |

**ANOVA**

|                                                                                      |                | Sum of Squares | df   | Mean Square | F      |
|--------------------------------------------------------------------------------------|----------------|----------------|------|-------------|--------|
| Symptoms that can be reduced by contact with nature - Irritability                   | Between Groups | 11,399         | 2    | 5,699       | 10,129 |
|                                                                                      | Within Groups  | 780,429        | 1387 | ,563        |        |
|                                                                                      | Total          | 791,828        | 1389 |             |        |
| Symptoms that can be reduced by contact with nature - Lack of ability to concentrate | Between Groups | 4,986          | 2    | 2,493       | 3,380  |
|                                                                                      | Within Groups  | 1023,215       | 1387 | ,738        |        |
|                                                                                      | Total          | 1028,201       | 1389 |             |        |
| Symptoms that can be reduced by contact with nature - Insomnia                       | Between Groups | 7,693          | 2    | 3,846       | 4,369  |
|                                                                                      | Within Groups  | 1221,220       | 1387 | ,880        |        |
|                                                                                      | Total          | 1228,913       | 1389 |             |        |
| Symptoms that can be reduced by contact with nature - Muscular tension               | Between Groups | 14,219         | 2    | 7,109       | 6,951  |
|                                                                                      | Within Groups  | 1412,417       | 1381 | 1,023       |        |
|                                                                                      | Total          | 1426,636       | 1383 |             |        |
| Symptoms that can be reduced by contact with nature - Pain                           | Between Groups | 9,717          | 2    | 4,859       | 4,637  |
|                                                                                      | Within Groups  | 1451,161       | 1385 | 1,048       |        |
|                                                                                      | Total          | 1460,878       | 1387 |             |        |
| Symptoms that can be reduced by contact with nature - General anxiety                | Between Groups | 14,258         | 2    | 7,129       | 8,893  |
|                                                                                      | Within Groups  | 1111,094       | 1386 | ,802        |        |
|                                                                                      | Total          | 1125,352       | 1388 |             |        |
| Symptoms that can be reduced by contact with nature - Depression                     | Between Groups | 8,882          | 2    | 4,441       | 4,548  |
|                                                                                      | Within Groups  | 1355,295       | 1388 | ,976        |        |
|                                                                                      | Total          | 1364,177       | 1390 |             |        |
| Symptoms that can be reduced by contact with nature - Short term memory              | Between Groups | 18,255         | 2    | 9,127       | 7,419  |
|                                                                                      | Within Groups  | 1702,786       | 1384 | 1,230       |        |
|                                                                                      | Total          | 1721,041       | 1386 |             |        |

**ANOVA**

|                                                                                      |                | Sig. |
|--------------------------------------------------------------------------------------|----------------|------|
| Symptoms that can be reduced by contact with nature - Irritability                   | Between Groups | ,000 |
|                                                                                      | Within Groups  |      |
|                                                                                      | Total          |      |
| Symptoms that can be reduced by contact with nature - Lack of ability to concentrate | Between Groups | ,034 |
|                                                                                      | Within Groups  |      |
|                                                                                      | Total          |      |
| Symptoms that can be reduced by contact with nature - Insomnia                       | Between Groups | ,013 |
|                                                                                      | Within Groups  |      |
|                                                                                      | Total          |      |
| Symptoms that can be reduced by contact with nature - Muscular tension               | Between Groups | ,001 |
|                                                                                      | Within Groups  |      |

|                                                                         |                |      |
|-------------------------------------------------------------------------|----------------|------|
|                                                                         | Total          |      |
| Symptoms that can be reduced by contact with nature - Pain              | Between Groups | ,010 |
|                                                                         | Within Groups  |      |
|                                                                         | Total          |      |
| Symptoms that can be reduced by contact with nature - General anxiety   | Between Groups | ,000 |
|                                                                         | Within Groups  |      |
|                                                                         | Total          |      |
| Symptoms that can be reduced by contact with nature - Depression        | Between Groups | ,011 |
|                                                                         | Within Groups  |      |
|                                                                         | Total          |      |
| Symptoms that can be reduced by contact with nature - Short term memory | Between Groups | ,001 |
|                                                                         | Within Groups  |      |
|                                                                         | Total          |      |

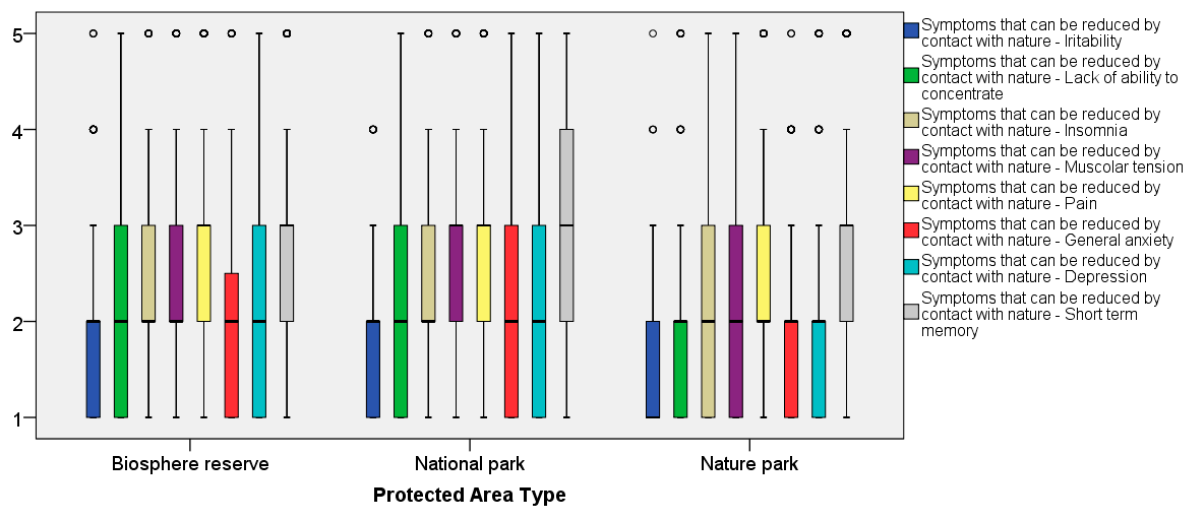

9. Relationships between the circumstances for PA visit and country (for two visitor age categories: age < 24 years and age > 65 years)

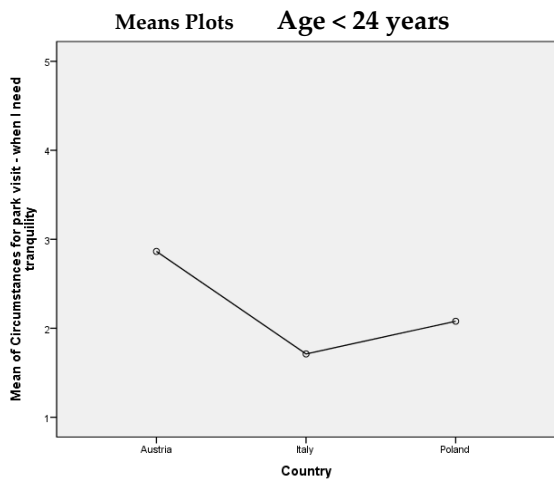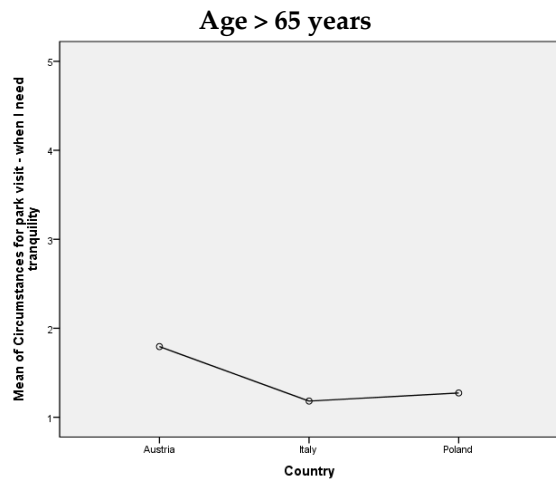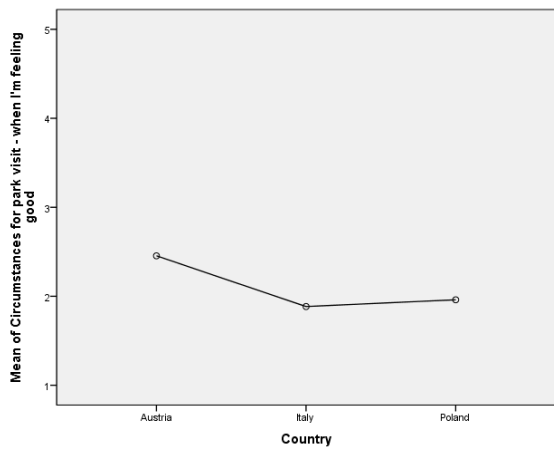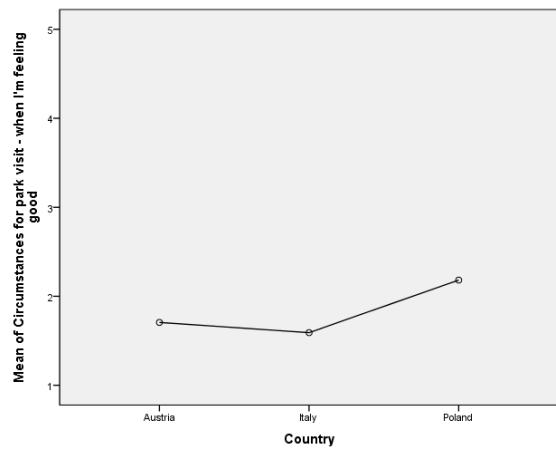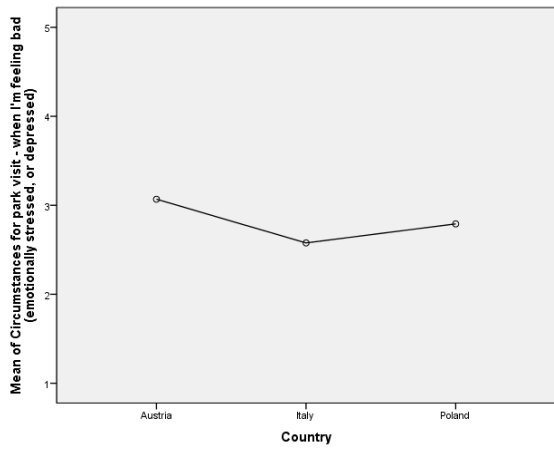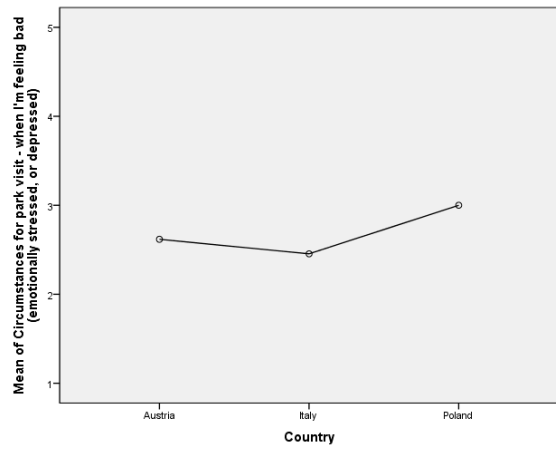

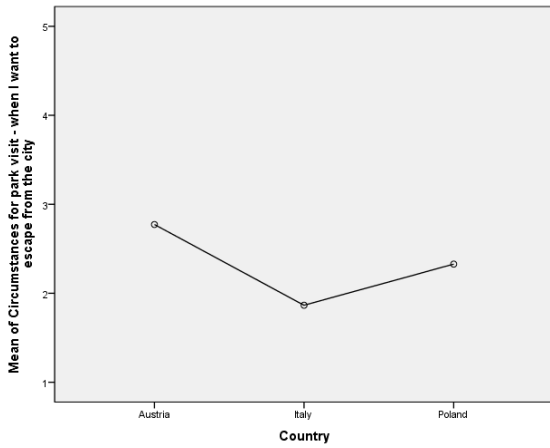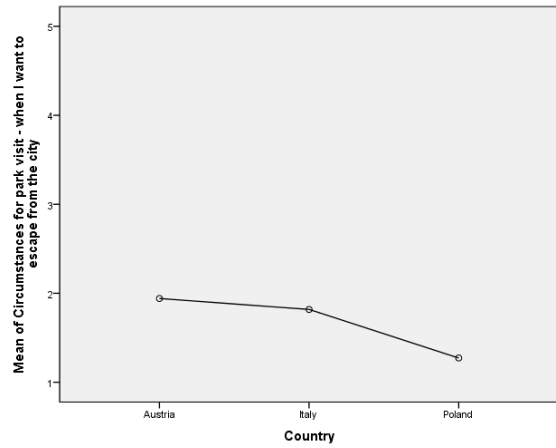

**10. Relationships between the circumstances for PA visit and country (for visitor age category < 24 years)**

**ANOVA**

|                                                                                          |                | Sum of Squares | df  | Mean Square | F      |
|------------------------------------------------------------------------------------------|----------------|----------------|-----|-------------|--------|
| Circumstances for park visit - when I need tranquility                                   | Between Groups | 53,326         | 2   | 26,663      | 20,226 |
|                                                                                          | Within Groups  | 413,929        | 314 | 1,318       |        |
|                                                                                          | Total          | 467,256        | 316 |             |        |
| Circumstances for park visit - when I'm feeling good                                     | Between Groups | 16,851         | 2   | 8,426       | 8,650  |
|                                                                                          | Within Groups  | 305,849        | 314 | ,974        |        |
|                                                                                          | Total          | 322,700        | 316 |             |        |
| Circumstances for park visit - when I'm feeling bad (emotionally stressed, or depressed) | Between Groups | 8,590          | 2   | 4,295       | 2,700  |
|                                                                                          | Within Groups  | 499,549        | 314 | 1,591       |        |
|                                                                                          | Total          | 508,139        | 316 |             |        |
| Circumstances for park visit - when I want to escape from the city                       | Between Groups | 27,821         | 2   | 13,911      | 8,692  |
|                                                                                          | Within Groups  | 502,507        | 314 | 1,600       |        |
|                                                                                          | Total          | 530,328        | 316 |             |        |

**ANOVA**

|                                                                                          |                | Sig. |
|------------------------------------------------------------------------------------------|----------------|------|
| Circumstances for park visit - when I need tranquility                                   | Between Groups | ,000 |
|                                                                                          | Within Groups  |      |
|                                                                                          | Total          |      |
| Circumstances for park visit - when I'm feeling good                                     | Between Groups | ,000 |
|                                                                                          | Within Groups  |      |
|                                                                                          | Total          |      |
| Circumstances for park visit - when I'm feeling bad (emotionally stressed, or depressed) | Between Groups | ,069 |
|                                                                                          | Within Groups  |      |
|                                                                                          | Total          |      |



|                                                                    |                |      |
|--------------------------------------------------------------------|----------------|------|
| Circumstances for park visit - when I want to escape from the city | Between Groups | ,000 |
|                                                                    | Within Groups  |      |
|                                                                    | Total          |      |

**11. Relationships between the circumstances for PA visit and country (for visitor age category > 65 years)**

**Oneway**

**ANOVA**

|                                                                                          |                | Sum of Squares | df | Mean Square | F     |
|------------------------------------------------------------------------------------------|----------------|----------------|----|-------------|-------|
| Circumstances for park visit - when I need tranquility                                   | Between Groups | 5,733          | 2  | 2,866       | 8,730 |
|                                                                                          | Within Groups  | 21,013         | 64 | ,328        |       |
|                                                                                          | Total          | 26,746         | 66 |             |       |
| Circumstances for park visit - when I'm feeling good                                     | Between Groups | 2,673          | 2  | 1,337       | 2,138 |
|                                                                                          | Within Groups  | 40,013         | 64 | ,625        |       |
|                                                                                          | Total          | 42,687         | 66 |             |       |
| Circumstances for park visit - when I'm feeling bad (emotionally stressed, or depressed) | Between Groups | 2,188          | 2  | 1,094       | ,765  |
|                                                                                          | Within Groups  | 91,484         | 64 | 1,429       |       |
|                                                                                          | Total          | 93,672         | 66 |             |       |
| Circumstances for park visit - when I want to escape from the city                       | Between Groups | 3,738          | 2  | 1,869       | 2,527 |
|                                                                                          | Within Groups  | 47,337         | 64 | ,740        |       |
|                                                                                          | Total          | 51,075         | 66 |             |       |

**ANOVA**

|                                                                                          |                | Sig. |
|------------------------------------------------------------------------------------------|----------------|------|
| Circumstances for park visit - when I need tranquility                                   | Between Groups | ,000 |
|                                                                                          | Within Groups  |      |
|                                                                                          | Total          |      |
| Circumstances for park visit - when I'm feeling good                                     | Between Groups | ,126 |
|                                                                                          | Within Groups  |      |
|                                                                                          | Total          |      |
| Circumstances for park visit - when I'm feeling bad (emotionally stressed, or depressed) | Between Groups | ,469 |
|                                                                                          | Within Groups  |      |
|                                                                                          | Total          |      |
| Circumstances for park visit - when I want to escape from the city                       | Between Groups | ,088 |
|                                                                                          | Within Groups  |      |
|                                                                                          | Total          |      |



**12. Relationships between the symptoms that can be reduced by contact with nature and country (for visitor age category < 24 years)**

**Oneway**

|                                                                                      |                | ANOVA          |     |             |       |
|--------------------------------------------------------------------------------------|----------------|----------------|-----|-------------|-------|
|                                                                                      |                | Sum of Squares | df  | Mean Square | F     |
| Symptoms that can be reduced by contact with nature - Irritability                   | Between Groups | 3,415          | 2   | 1,707       | 2,527 |
|                                                                                      | Within Groups  | 211,522        | 313 | ,676        |       |
|                                                                                      | Total          | 214,937        | 315 |             |       |
| Symptoms that can be reduced by contact with nature - Lack of ability to concentrate | Between Groups | ,345           | 2   | ,173        | ,206  |
|                                                                                      | Within Groups  | 262,427        | 313 | ,838        |       |
|                                                                                      | Total          | 262,772        | 315 |             |       |
| Symptoms that can be reduced by contact with nature - Insomnia                       | Between Groups | ,213           | 2   | ,106        | ,124  |
|                                                                                      | Within Groups  | 268,332        | 313 | ,857        |       |
|                                                                                      | Total          | 268,544        | 315 |             |       |
| Symptoms that can be reduced by contact with nature - Muscular tension               | Between Groups | 5,132          | 2   | 2,566       | 2,165 |
|                                                                                      | Within Groups  | 370,944        | 313 | 1,185       |       |
|                                                                                      | Total          | 376,076        | 315 |             |       |
| Symptoms that can be reduced by contact with nature - Pain                           | Between Groups | 9,132          | 2   | 4,566       | 4,533 |
|                                                                                      | Within Groups  | 315,308        | 313 | 1,007       |       |
|                                                                                      | Total          | 324,440        | 315 |             |       |
| Symptoms that can be reduced by contact with nature - General anxiety                | Between Groups | 4,177          | 2   | 2,088       | 2,374 |
|                                                                                      | Within Groups  | 274,439        | 312 | ,880        |       |
|                                                                                      | Total          | 278,616        | 314 |             |       |
| Symptoms that can be reduced by contact with nature - Depression                     | Between Groups | ,334           | 2   | ,167        | ,181  |
|                                                                                      | Within Groups  | 288,856        | 313 | ,923        |       |
|                                                                                      | Total          | 289,190        | 315 |             |       |
| Symptoms that can be reduced by contact with nature - Short term memory              | Between Groups | ,562           | 2   | ,281        | ,230  |
|                                                                                      | Within Groups  | 383,905        | 314 | 1,223       |       |
|                                                                                      | Total          | 384,467        | 316 |             |       |

|                                                                                      |                | ANOVA |      |
|--------------------------------------------------------------------------------------|----------------|-------|------|
|                                                                                      |                |       | Sig. |
| Symptoms that can be reduced by contact with nature - Irritability                   | Between Groups |       | ,082 |
|                                                                                      | Within Groups  |       |      |
|                                                                                      | Total          |       |      |
| Symptoms that can be reduced by contact with nature - Lack of ability to concentrate | Between Groups |       | ,814 |
|                                                                                      | Within Groups  |       |      |
|                                                                                      | Total          |       |      |
| Symptoms that can be reduced by contact with nature - Short term memory              | Between Groups |       | ,883 |

|                                                                         |                |      |
|-------------------------------------------------------------------------|----------------|------|
| nature - Insomnia                                                       | Within Groups  |      |
|                                                                         | Total          |      |
| Symptoms that can be reduced by contact with nature - Muscular tension  | Between Groups | ,116 |
|                                                                         | Within Groups  |      |
| Symptoms that can be reduced by contact with nature - Pain              | Between Groups | ,011 |
|                                                                         | Within Groups  |      |
| Symptoms that can be reduced by contact with nature - General anxiety   | Between Groups | ,095 |
|                                                                         | Within Groups  |      |
| Symptoms that can be reduced by contact with nature - Depression        | Between Groups | ,835 |
|                                                                         | Within Groups  |      |
| Symptoms that can be reduced by contact with nature - Short term memory | Between Groups | ,795 |
|                                                                         | Within Groups  |      |
|                                                                         | Total          |      |

**13. Relationships between the symptoms that can be reduced by contact with nature and country (for visitor age category > 65 years)**

**Oneway**

|                                                                                      |                | ANOVA          |    |             |       |
|--------------------------------------------------------------------------------------|----------------|----------------|----|-------------|-------|
|                                                                                      |                | Sum of Squares | df | Mean Square | F     |
| Symptoms that can be reduced by contact with nature - Irritability                   | Between Groups | 1,396          | 2  | ,698        | 1,424 |
|                                                                                      | Within Groups  | 31,380         | 64 | ,490        |       |
|                                                                                      | Total          | 32,776         | 66 |             |       |
| Symptoms that can be reduced by contact with nature - Lack of ability to concentrate | Between Groups | 1,904          | 2  | ,952        | 2,211 |
|                                                                                      | Within Groups  | 27,559         | 64 | ,431        |       |
|                                                                                      | Total          | 29,463         | 66 |             |       |
| Symptoms that can be reduced by contact with nature - Insomnia                       | Between Groups | 2,468          | 2  | 1,234       | 2,760 |
|                                                                                      | Within Groups  | 28,607         | 64 | ,447        |       |
|                                                                                      | Total          | 31,075         | 66 |             |       |
| Symptoms that can be reduced by contact with nature - Muscular tension               | Between Groups | 8,156          | 2  | 4,078       | 7,572 |
|                                                                                      | Within Groups  | 34,471         | 64 | ,539        |       |
|                                                                                      | Total          | 42,627         | 66 |             |       |
| Symptoms that can be reduced by contact with nature - Pain                           | Between Groups | 4,819          | 2  | 2,409       | 2,604 |
|                                                                                      | Within Groups  | 59,211         | 64 | ,925        |       |
|                                                                                      | Total          | 64,030         | 66 |             |       |
| Symptoms that can be reduced by contact with nature - General anxiety                | Between Groups | ,758           | 2  | ,379        | 1,081 |
|                                                                                      | Within Groups  | 22,436         | 64 | ,351        |       |
|                                                                                      | Total          | 23,194         | 66 |             |       |
| Symptoms that can be reduced by contact with nature - Depression                     | Between Groups | 1,560          | 2  | ,780        | 1,360 |
|                                                                                      | Within Groups  | 36,709         | 64 | ,574        |       |
|                                                                                      | Total          | 38,269         | 66 |             |       |
| Symptoms that can be reduced by contact with nature - Short term memory              | Between Groups | 4,860          | 2  | 2,430       | 2,600 |
|                                                                                      | Within Groups  | 59,826         | 64 | ,935        |       |
|                                                                                      | Total          | 64,687         | 66 |             |       |

|                                                                                      |                | ANOVA |      |
|--------------------------------------------------------------------------------------|----------------|-------|------|
|                                                                                      |                |       | Sig. |
| Symptoms that can be reduced by contact with nature - Irritability                   | Between Groups |       | ,248 |
|                                                                                      | Within Groups  |       |      |
|                                                                                      | Total          |       |      |
| Symptoms that can be reduced by contact with nature - Lack of ability to concentrate | Between Groups |       | ,118 |
|                                                                                      | Within Groups  |       |      |
|                                                                                      | Total          |       |      |
| Symptoms that can be reduced by contact with nature - Short term memory              | Between Groups |       | ,071 |

|                                                                         |                |      |
|-------------------------------------------------------------------------|----------------|------|
| nature - Insomnia                                                       | Within Groups  |      |
|                                                                         | Total          |      |
| Symptoms that can be reduced by contact with nature - Muscular tension  | Between Groups | ,001 |
|                                                                         | Within Groups  |      |
| Symptoms that can be reduced by contact with nature - Pain              | Between Groups | ,082 |
|                                                                         | Within Groups  |      |
| Symptoms that can be reduced by contact with nature - General anxiety   | Between Groups | ,345 |
|                                                                         | Within Groups  |      |
| Symptoms that can be reduced by contact with nature - Depression        | Between Groups | ,264 |
|                                                                         | Within Groups  |      |
| Symptoms that can be reduced by contact with nature - Short term memory | Between Groups | ,082 |
|                                                                         | Within Groups  |      |
|                                                                         | Total          |      |

**Means Plots Age <24**

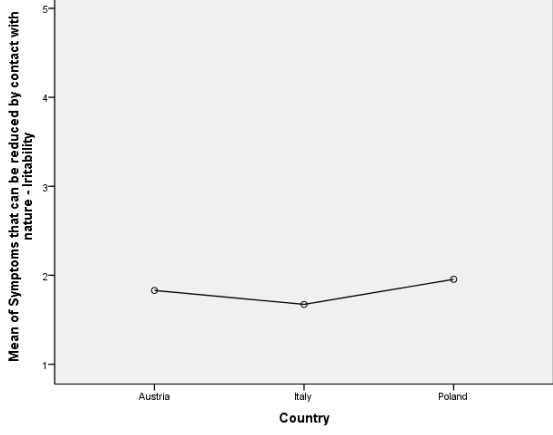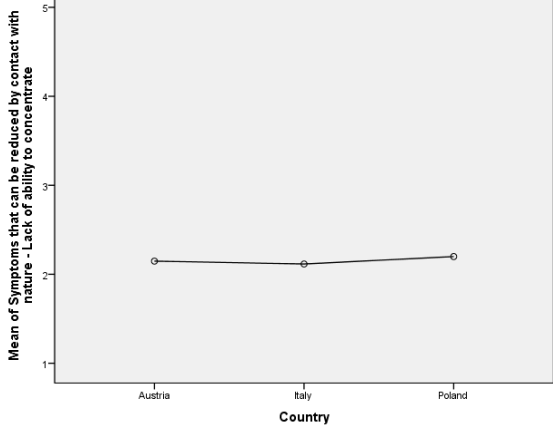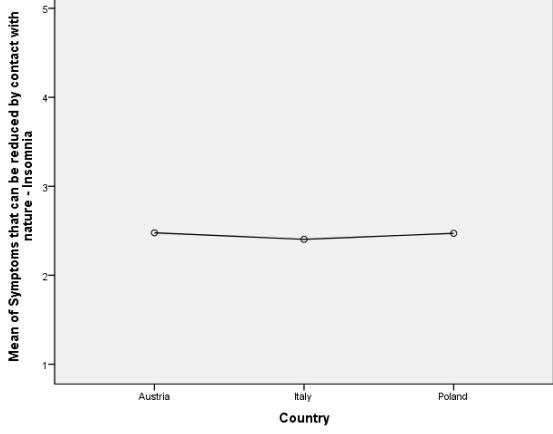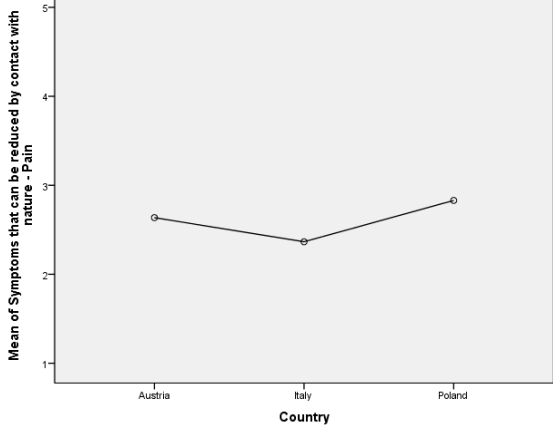

**Age >65**

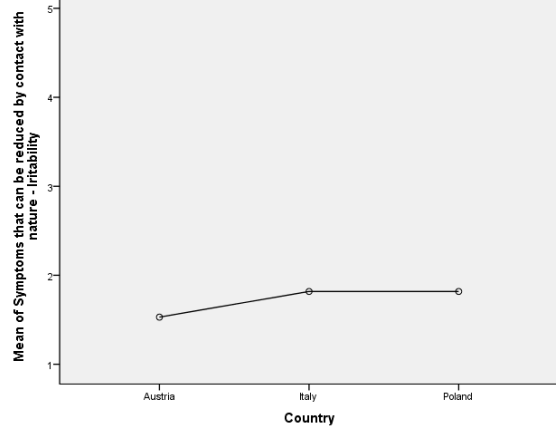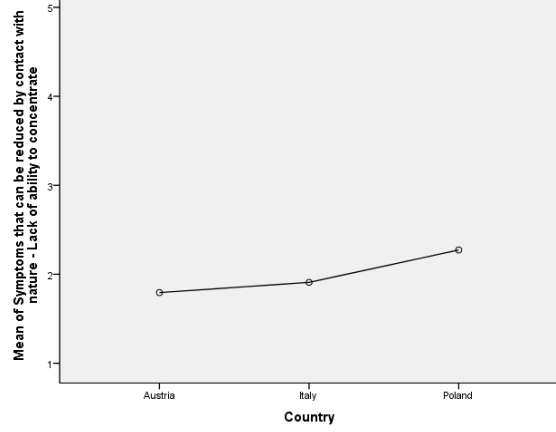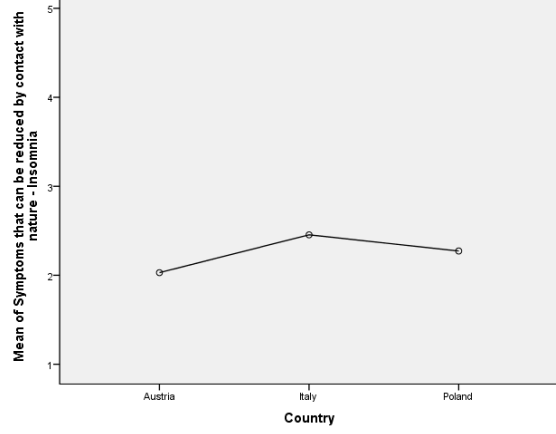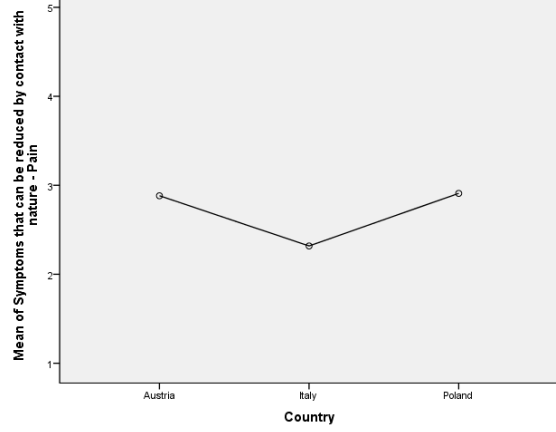

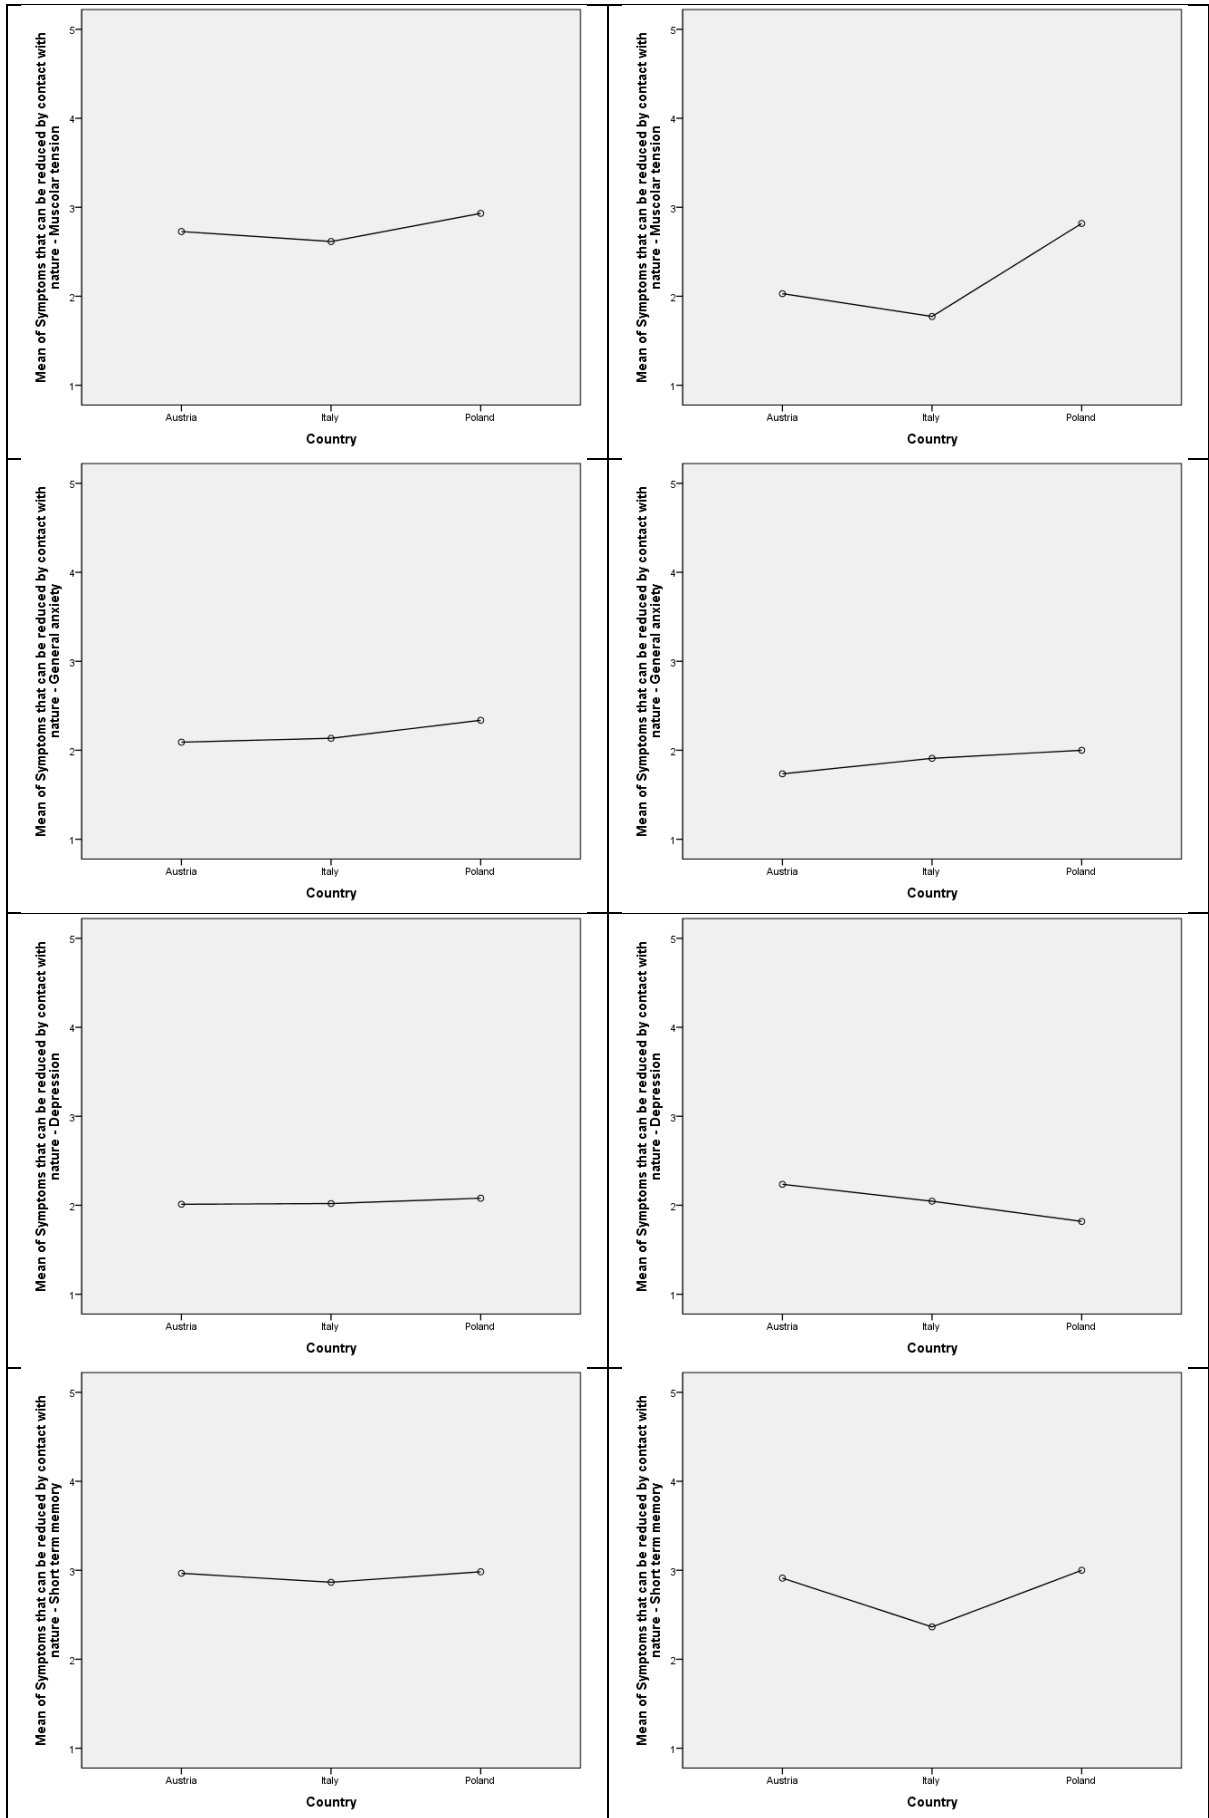

## Post Hoc Tests



**14. Relationships between the circumstances for PA visit and country (whole sample; results of post-hoc tests)**

**Multiple Comparisons**

| Dependent Variable                                                                       |             | (I) Country | (J) Country | Mean Difference (I-J) | Std. Error | Sig.  | 95% Confidence Interval |             |
|------------------------------------------------------------------------------------------|-------------|-------------|-------------|-----------------------|------------|-------|-------------------------|-------------|
|                                                                                          |             |             |             |                       |            |       | Lower Bound             | Upper Bound |
| Circumstances for park visit - when I need tranquility                                   | LSD         | Austria     | Italy       | ,537*                 | ,067       | ,000  | ,40                     | ,67         |
|                                                                                          |             |             | Poland      | ,420*                 | ,067       | ,000  | ,29                     | ,55         |
|                                                                                          |             | Italy       | Austria     | -,537*                | ,067       | ,000  | -,67                    | -,40        |
|                                                                                          |             |             | Poland      | -,117                 | ,068       | ,085  | -,25                    | ,02         |
|                                                                                          |             | Poland      | Austria     | -,420*                | ,067       | ,000  | -,55                    | -,29        |
|                                                                                          |             |             | Italy       | ,117                  | ,068       | ,085  | -,02                    | ,25         |
|                                                                                          | Bonferro ni | Austria     | Italy       | ,537*                 | ,067       | ,000  | ,38                     | ,70         |
|                                                                                          |             |             | Poland      | ,420*                 | ,067       | ,000  | ,26                     | ,58         |
|                                                                                          |             | Italy       | Austria     | -,537*                | ,067       | ,000  | -,70                    | -,38        |
|                                                                                          |             |             | Poland      | -,117                 | ,068       | ,255  | -,28                    | ,05         |
|                                                                                          |             | Poland      | Austria     | -,420*                | ,067       | ,000  | -,58                    | -,26        |
|                                                                                          |             |             | Italy       | ,117                  | ,068       | ,255  | -,05                    | ,28         |
| Circumstances for park visit - when I'm feeling good                                     | LSD         | Austria     | Italy       | ,209*                 | ,058       | ,000  | ,09                     | ,32         |
|                                                                                          |             |             | Poland      | ,158*                 | ,058       | ,007  | ,04                     | ,27         |
|                                                                                          |             | Italy       | Austria     | -,209*                | ,058       | ,000  | -,32                    | -,09        |
|                                                                                          |             |             | Poland      | -,051                 | ,059       | ,388  | -,17                    | ,06         |
|                                                                                          |             | Poland      | Austria     | -,158*                | ,058       | ,007  | -,27                    | -,04        |
|                                                                                          |             |             | Italy       | ,051                  | ,059       | ,388  | -,06                    | ,17         |
|                                                                                          | Bonferro ni | Austria     | Italy       | ,209*                 | ,058       | ,001  | ,07                     | ,35         |
|                                                                                          |             |             | Poland      | ,158*                 | ,058       | ,020  | ,02                     | ,30         |
|                                                                                          |             | Italy       | Austria     | -,209*                | ,058       | ,001  | -,35                    | -,07        |
|                                                                                          |             |             | Poland      | -,051                 | ,059       | 1,000 | -,19                    | ,09         |
|                                                                                          |             | Poland      | Austria     | -,158*                | ,058       | ,020  | -,30                    | -,02        |
|                                                                                          |             |             | Italy       | ,051                  | ,059       | 1,000 | -,09                    | ,19         |
| Circumstances for park visit - when I'm feeling bad (emotionally stressed, or depressed) | LSD         | Austria     | Italy       | ,232*                 | ,080       | ,004  | ,07                     | ,39         |
|                                                                                          |             |             | Poland      | ,208*                 | ,080       | ,009  | ,05                     | ,37         |
|                                                                                          |             | Italy       | Austria     | -,232*                | ,080       | ,004  | -,39                    | -,07        |
|                                                                                          |             |             | Poland      | -,024                 | ,081       | ,769  | -,18                    | ,13         |
|                                                                                          |             | Poland      | Austria     | -,208*                | ,080       | ,009  | -,37                    | -,05        |
|                                                                                          |             |             | Italy       | ,024                  | ,081       | ,769  | -,13                    | ,18         |
|                                                                                          | Bonferro ni | Austria     | Italy       | ,232*                 | ,080       | ,012  | ,04                     | ,42         |
|                                                                                          |             |             | Poland      | ,208*                 | ,080       | ,028  | ,02                     | ,40         |
|                                                                                          |             | Italy       | Austria     | -,232*                | ,080       | ,012  | -,42                    | -,04        |

|                                                                             |                |         |         |  |        |      |       |  |      |      |
|-----------------------------------------------------------------------------|----------------|---------|---------|--|--------|------|-------|--|------|------|
|                                                                             |                |         | Poland  |  | -,024  | ,081 | 1,000 |  | -,22 | ,17  |
|                                                                             |                | Poland  | Austria |  | -,208* | ,080 | ,028  |  | -,40 | -,02 |
|                                                                             |                |         | Italy   |  | ,024   | ,081 | 1,000 |  | -,17 | ,22  |
| Circumstances for<br>park visit - when I<br>want to escape from<br>the city | LSD            | Austria | Italy   |  | ,318*  | ,080 | ,000  |  | ,16  | ,48  |
|                                                                             |                |         | Poland  |  | -,230* | ,080 | ,004  |  | -,39 | -,07 |
|                                                                             |                | Italy   | Austria |  | -,318* | ,080 | ,000  |  | -,48 | -,16 |
|                                                                             |                |         | Poland  |  | -,548* | ,081 | ,000  |  | -,71 | -,39 |
|                                                                             |                | Poland  | Austria |  | ,230*  | ,080 | ,004  |  | ,07  | ,39  |
|                                                                             |                |         | Italy   |  | ,548*  | ,081 | ,000  |  | ,39  | ,71  |
|                                                                             | Bonferro<br>ni | Austria | Italy   |  | ,318*  | ,080 | ,000  |  | ,12  | ,51  |
|                                                                             |                |         | Poland  |  | -,230* | ,080 | ,013  |  | -,42 | -,04 |
|                                                                             |                | Italy   | Austria |  | -,318* | ,080 | ,000  |  | -,51 | -,12 |
|                                                                             |                |         | Poland  |  | -,548* | ,081 | ,000  |  | -,74 | -,35 |
|                                                                             |                | Poland  | Austria |  | ,230*  | ,080 | ,013  |  | ,04  | ,42  |
|                                                                             |                |         | Italy   |  | ,548*  | ,081 | ,000  |  | ,35  | ,74  |

\*. The mean difference is significant at the 0.05 level.
